# Supplementary material for: Drug repositioning: a machine-learning approach through data integration
Source: PubMed Central journal article supplement (PMC3704944; doi:10.1186/1758-2946-5-30), 2013-06-22
Supplement: 1758-2946-5-30-S1.pdf [file 1758-2946-5-30-S1.pdf]

| <b>Drug Name</b> | <b>original ATC therapeutic class</b>  | <b>predicted ATC therapeutic class</b>                  | <b>Repositioned</b> | <b>Score</b> |
|------------------|----------------------------------------|---------------------------------------------------------|---------------------|--------------|
| carbamazepine    | ANTIEPILEPTICS (N03)                   | CARDIAC THERAPY (C01)                                   | Y                   | 1            |
| chlorphenamine   | ANTIHIISTAMINES FOR SYSTEMIC USE (R06) | PSYCHOANALEPTICS (N06)                                  | Y                   | 1            |
| dobutamine       | CARDIAC THERAPY (C01)                  | BETA BLOCKING AGENTS (C07)                              | Y                   | 1            |
| gefitinib        | ANTINEOPLASTIC AGENTS (L01)            | ANTIBACTERIALS FOR SYSTEMIC USE (J01)                   | Y                   | 1            |
| hydroxyzine      | PSYCHOLEPTICS (N05)                    | ANTIHIISTAMINES FOR SYSTEMIC USE (R06)                  | Y                   | 1            |
| ivermectin       | ANTHELMINTICS (P02)                    | ANTIBACTERIALS FOR SYSTEMIC USE (J01)                   | Y                   | 1            |
| levobunolol      | OPHTHALMOLOGICALS (S01)                | BETA BLOCKING AGENTS (C07)                              | Y                   | 1            |
| niclosamide      | ANTHELMINTICS (P02)                    | ANTINEOPLASTIC AGENTS (L01)                             | Y                   | 1            |
| oxamniquine      | ANTHELMINTICS (P02)                    | ANTINEOPLASTIC AGENTS (L01)                             | Y                   | 1            |
| spironolactone   | DIURETICS (C03)                        | SEX HORMONES AND MODULATORS OF THE GENITAL SYSTEM (G03) | Y                   | 1            |
| sulfacetamide    | OPHTHALMOLOGICALS (S01)                | ANTIBACTERIALS FOR SYSTEMIC USE (J01)                   | Y                   | 1            |
| thiethylperazine | ANTIHIISTAMINES FOR SYSTEMIC USE (R06) | PSYCHOLEPTICS (N05)                                     | Y                   | 1            |
| acebutolol       | BETA BLOCKING AGENTS (C07)             | BETA BLOCKING AGENTS (C07)                              | N                   | 1            |
| acepromazine     | PSYCHOLEPTICS (N05)                    | PSYCHOLEPTICS (N05)                                     | N                   | 1            |
| acetazolamide    | OPHTHALMOLOGICALS (S01)                | OPHTHALMOLOGICALS (S01)                                 | N                   | 1            |
| alprenolol       | BETA BLOCKING AGENTS (C07)             | BETA BLOCKING AGENTS (C07)                              | N                   | 1            |
| amitriptyline    | PSYCHOANALEPTICS (N06)                 | PSYCHOANALEPTICS (N06)                                  | N                   | 1            |
| amoxicillin      | ANTIBACTERIALS FOR SYSTEMIC USE (J01)  | ANTIBACTERIALS FOR SYSTEMIC USE (J01)                   | N                   | 1            |
| astemizole       | ANTIHIISTAMINES FOR SYSTEMIC USE (R06) | ANTIHIISTAMINES FOR SYSTEMIC USE (R06)                  | N                   | 1            |
| azlocillin       | ANTIBACTERIALS FOR SYSTEMIC USE (J01)  | ANTIBACTERIALS FOR SYSTEMIC USE (J01)                   | N                   | 1            |
| aztreonam        | ANTIBACTERIALS FOR SYSTEMIC USE (J01)  | ANTIBACTERIALS FOR SYSTEMIC USE (J01)                   | N                   | 1            |
| bacampicillin    | ANTIBACTERIALS FOR SYSTEMIC USE (J01)  | ANTIBACTERIALS FOR SYSTEMIC USE (J01)                   | N                   | 1            |
| bisoprolol       | BETA BLOCKING AGENTS (C07)             | BETA BLOCKING AGENTS (C07)                              | N                   | 1            |
| brinzolamide     | OPHTHALMOLOGICALS (S01)                | OPHTHALMOLOGICALS (S01)                                 | N                   | 1            |
| bumetanide       | DIURETICS (C03)                        | DIURETICS (C03)                                         | N                   | 1            |
| carbinoxamine    | ANTIHIISTAMINES FOR SYSTEMIC USE (R06) | ANTIHIISTAMINES FOR SYSTEMIC USE (R06)                  | N                   | 1            |
| carmustine       | ANTINEOPLASTIC AGENTS (L01)            | ANTINEOPLASTIC AGENTS (L01)                             | N                   | 1            |
| cefaclor         | ANTIBACTERIALS FOR SYSTEMIC USE (J01)  | ANTIBACTERIALS FOR SYSTEMIC USE (J01)                   | N                   | 1            |
| cefadroxil       | ANTIBACTERIALS FOR SYSTEMIC USE (J01)  | ANTIBACTERIALS FOR SYSTEMIC USE (J01)                   | N                   | 1            |
| cefalotin        | ANTIBACTERIALS FOR SYSTEMIC USE (J01)  | ANTIBACTERIALS FOR SYSTEMIC USE (J01)                   | N                   | 1            |
| cefamandole      | ANTIBACTERIALS FOR SYSTEMIC USE (J01)  | ANTIBACTERIALS FOR SYSTEMIC USE (J01)                   | N                   | 1            |
| cefazolin        | ANTIBACTERIALS FOR SYSTEMIC USE (J01)  | ANTIBACTERIALS FOR SYSTEMIC USE (J01)                   | N                   | 1            |
| cefepime         | ANTIBACTERIALS FOR SYSTEMIC USE (J01)  | ANTIBACTERIALS FOR SYSTEMIC USE (J01)                   | N                   | 1            |
| cefixime         | ANTIBACTERIALS FOR SYSTEMIC USE (J01)  | ANTIBACTERIALS FOR SYSTEMIC USE (J01)                   | N                   | 1            |
| cefmetazole      | ANTIBACTERIALS FOR SYSTEMIC USE (J01)  | ANTIBACTERIALS FOR SYSTEMIC USE (J01)                   | N                   | 1            |
| cefoperazone     | ANTIBACTERIALS FOR SYSTEMIC USE (J01)  | ANTIBACTERIALS FOR SYSTEMIC USE (J01)                   | N                   | 1            |

|                  |                                                         |                                                         |   |   |
|------------------|---------------------------------------------------------|---------------------------------------------------------|---|---|
| ceforanide       | ANTIBACTERIALS FOR SYSTEMIC USE (J01)                   | ANTIBACTERIALS FOR SYSTEMIC USE (J01)                   | N | 1 |
| cefotaxime       | ANTIBACTERIALS FOR SYSTEMIC USE (J01)                   | ANTIBACTERIALS FOR SYSTEMIC USE (J01)                   | N | 1 |
| cefotetan        | ANTIBACTERIALS FOR SYSTEMIC USE (J01)                   | ANTIBACTERIALS FOR SYSTEMIC USE (J01)                   | N | 1 |
| cefotiam         | ANTIBACTERIALS FOR SYSTEMIC USE (J01)                   | ANTIBACTERIALS FOR SYSTEMIC USE (J01)                   | N | 1 |
| cefoxitin        | ANTIBACTERIALS FOR SYSTEMIC USE (J01)                   | ANTIBACTERIALS FOR SYSTEMIC USE (J01)                   | N | 1 |
| ceftazidime      | ANTIBACTERIALS FOR SYSTEMIC USE (J01)                   | ANTIBACTERIALS FOR SYSTEMIC USE (J01)                   | N | 1 |
| cefuroxime       | ANTIBACTERIALS FOR SYSTEMIC USE (J01)                   | ANTIBACTERIALS FOR SYSTEMIC USE (J01)                   | N | 1 |
| cetirizine       | ANTIHISTAMINES FOR SYSTEMIC USE (R06)                   | ANTIHISTAMINES FOR SYSTEMIC USE (R06)                   | N | 1 |
| chlorambucil     | ANTINEOPLASTIC AGENTS (L01)                             | ANTINEOPLASTIC AGENTS (L01)                             | N | 1 |
| chlorpromazine   | PSYCHOLEPTICS (N05)                                     | PSYCHOLEPTICS (N05)                                     | N | 1 |
| chlorpropamide   | DRUGS USED IN DIABETES (A10)                            | DRUGS USED IN DIABETES (A10)                            | N | 1 |
| chlorprothixene  | PSYCHOLEPTICS (N05)                                     | PSYCHOLEPTICS (N05)                                     | N | 1 |
| chlortalidone    | DIURETICS (C03)                                         | DIURETICS (C03)                                         | N | 1 |
| citalopram       | PSYCHOANALEPTICS (N06)                                  | PSYCHOANALEPTICS (N06)                                  | N | 1 |
| clofibrate       | LIPID MODIFYING AGENTS (C10)                            | LIPID MODIFYING AGENTS (C10)                            | N | 1 |
| clomipramine     | PSYCHOANALEPTICS (N06)                                  | PSYCHOANALEPTICS (N06)                                  | N | 1 |
| cloxacillin      | ANTIBACTERIALS FOR SYSTEMIC USE (J01)                   | ANTIBACTERIALS FOR SYSTEMIC USE (J01)                   | N | 1 |
| cyclizine        | ANTIHISTAMINES FOR SYSTEMIC USE (R06)                   | ANTIHISTAMINES FOR SYSTEMIC USE (R06)                   | N | 1 |
| dacarbazine      | ANTINEOPLASTIC AGENTS (L01)                             | ANTINEOPLASTIC AGENTS (L01)                             | N | 1 |
| danazol          | SEX HORMONES AND MODULATORS OF THE GENITAL SYSTEM (G03) | SEX HORMONES AND MODULATORS OF THE GENITAL SYSTEM (G03) | N | 1 |
| daunorubicin     | ANTINEOPLASTIC AGENTS (L01)                             | ANTINEOPLASTIC AGENTS (L01)                             | N | 1 |
| desipramine      | PSYCHOANALEPTICS (N06)                                  | PSYCHOANALEPTICS (N06)                                  | N | 1 |
| dicloxacillin    | ANTIBACTERIALS FOR SYSTEMIC USE (J01)                   | ANTIBACTERIALS FOR SYSTEMIC USE (J01)                   | N | 1 |
| diphenylpyraline | ANTIHISTAMINES FOR SYSTEMIC USE (R06)                   | ANTIHISTAMINES FOR SYSTEMIC USE (R06)                   | N | 1 |
| dirithromycin    | ANTIBACTERIALS FOR SYSTEMIC USE (J01)                   | ANTIBACTERIALS FOR SYSTEMIC USE (J01)                   | N | 1 |
| dorzolamide      | OPHTHALMOLOGICALS (S01)                                 | OPHTHALMOLOGICALS (S01)                                 | N | 1 |
| doxepin          | PSYCHOANALEPTICS (N06)                                  | PSYCHOANALEPTICS (N06)                                  | N | 1 |
| doxorubicin      | ANTINEOPLASTIC AGENTS (L01)                             | ANTINEOPLASTIC AGENTS (L01)                             | N | 1 |
| doxylamine       | ANTIHISTAMINES FOR SYSTEMIC USE (R06)                   | ANTIHISTAMINES FOR SYSTEMIC USE (R06)                   | N | 1 |
| dydrogesterone   | SEX HORMONES AND MODULATORS OF THE GENITAL SYSTEM (G03) | SEX HORMONES AND MODULATORS OF THE GENITAL SYSTEM (G03) | N | 1 |
| etodolac         | ANTIINFLAMMATORY AND ANTIRHEUMATIC PRODUCTS (M01)       | ANTIINFLAMMATORY AND ANTIRHEUMATIC PRODUCTS (M01)       | N | 1 |
| felodipine       | CALCIUM CHANNEL BLOCKERS (C08)                          | CALCIUM CHANNEL BLOCKERS (C08)                          | N | 1 |
| fenofibrate      | LIPID MODIFYING AGENTS (C10)                            | LIPID MODIFYING AGENTS (C10)                            | N | 1 |
| fenoprofen       | ANTIINFLAMMATORY AND ANTIRHEUMATIC PRODUCTS (M01)       | ANTIINFLAMMATORY AND ANTIRHEUMATIC PRODUCTS (M01)       | N | 1 |
| flucloxacillin   | ANTIBACTERIALS FOR SYSTEMIC USE (J01)                   | ANTIBACTERIALS FOR SYSTEMIC USE (J01)                   | N | 1 |
| flufenamic_acid  | ANTIINFLAMMATORY AND ANTIRHEUMATIC PRODUCTS (M01)       | ANTIINFLAMMATORY AND ANTIRHEUMATIC PRODUCTS (M01)       | N | 1 |
| fluoxetine       | PSYCHOANALEPTICS (N06)                                  | PSYCHOANALEPTICS (N06)                                  | N | 1 |

|                     |                                                   |                                                   |   |   |
|---------------------|---------------------------------------------------|---------------------------------------------------|---|---|
| fluphenazine        | PSYCHOLEPTICS (N05)                               | PSYCHOLEPTICS (N05)                               | N | 1 |
| fluspirilene        | PSYCHOLEPTICS (N05)                               | PSYCHOLEPTICS (N05)                               | N | 1 |
| fluvastatin         | LIPID MODIFYING AGENTS (C10)                      | LIPID MODIFYING AGENTS (C10)                      | N | 1 |
| fluvoxamine         | PSYCHOANALEPTICS (N06)                            | PSYCHOANALEPTICS (N06)                            | N | 1 |
| furosemide          | DIURETICS (C03)                                   | DIURETICS (C03)                                   | N | 1 |
| gliclazide          | DRUGS USED IN DIABETES (A10)                      | DRUGS USED IN DIABETES (A10)                      | N | 1 |
| glimepiride         | DRUGS USED IN DIABETES (A10)                      | DRUGS USED IN DIABETES (A10)                      | N | 1 |
| glipizide           | DRUGS USED IN DIABETES (A10)                      | DRUGS USED IN DIABETES (A10)                      | N | 1 |
| gliquidone          | DRUGS USED IN DIABETES (A10)                      | DRUGS USED IN DIABETES (A10)                      | N | 1 |
| haloperidol         | PSYCHOLEPTICS (N05)                               | PSYCHOLEPTICS (N05)                               | N | 1 |
| hydrochlorothiazide | DIURETICS (C03)                                   | DIURETICS (C03)                                   | N | 1 |
| hydroflumethiazide  | DIURETICS (C03)                                   | DIURETICS (C03)                                   | N | 1 |
| ifosfamide          | ANTINEOPLASTIC AGENTS (L01)                       | ANTINEOPLASTIC AGENTS (L01)                       | N | 1 |
| imipramine          | PSYCHOANALEPTICS (N06)                            | PSYCHOANALEPTICS (N06)                            | N | 1 |
| isradipine          | CALCIUM CHANNEL BLOCKERS (C08)                    | CALCIUM CHANNEL BLOCKERS (C08)                    | N | 1 |
| josamycin           | ANTIBACTERIALS FOR SYSTEMIC USE (J01)             | ANTIBACTERIALS FOR SYSTEMIC USE (J01)             | N | 1 |
| latamoxef           | ANTIBACTERIALS FOR SYSTEMIC USE (J01)             | ANTIBACTERIALS FOR SYSTEMIC USE (J01)             | N | 1 |
| lincomycin          | ANTIBACTERIALS FOR SYSTEMIC USE (J01)             | ANTIBACTERIALS FOR SYSTEMIC USE (J01)             | N | 1 |
| lomustine           | ANTINEOPLASTIC AGENTS (L01)                       | ANTINEOPLASTIC AGENTS (L01)                       | N | 1 |
| loracarbef          | ANTIBACTERIALS FOR SYSTEMIC USE (J01)             | ANTIBACTERIALS FOR SYSTEMIC USE (J01)             | N | 1 |
| lovastatin          | LIPID MODIFYING AGENTS (C10)                      | LIPID MODIFYING AGENTS (C10)                      | N | 1 |
| loxapine            | PSYCHOLEPTICS (N05)                               | PSYCHOLEPTICS (N05)                               | N | 1 |
| maprotiline         | PSYCHOANALEPTICS (N06)                            | PSYCHOANALEPTICS (N06)                            | N | 1 |
| mefenamic_acid      | ANTIINFLAMMATORY AND ANTIRHEUMATIC PRODUCTS (M01) | ANTIINFLAMMATORY AND ANTIRHEUMATIC PRODUCTS (M01) | N | 1 |
| meropenem           | ANTIBACTERIALS FOR SYSTEMIC USE (J01)             | ANTIBACTERIALS FOR SYSTEMIC USE (J01)             | N | 1 |
| mesoridazine        | PSYCHOLEPTICS (N05)                               | PSYCHOLEPTICS (N05)                               | N | 1 |
| metaraminol         | CARDIAC THERAPY (C01)                             | CARDIAC THERAPY (C01)                             | N | 1 |
| methazolamide       | OPHTHALMOLOGICALS (S01)                           | OPHTHALMOLOGICALS (S01)                           | N | 1 |
| methoxamine         | CARDIAC THERAPY (C01)                             | CARDIAC THERAPY (C01)                             | N | 1 |
| metolazone          | DIURETICS (C03)                                   | DIURETICS (C03)                                   | N | 1 |
| metoprolol          | BETA BLOCKING AGENTS (C07)                        | BETA BLOCKING AGENTS (C07)                        | N | 1 |
| mianserin           | PSYCHOANALEPTICS (N06)                            | PSYCHOANALEPTICS (N06)                            | N | 1 |
| minaprine           | PSYCHOANALEPTICS (N06)                            | PSYCHOANALEPTICS (N06)                            | N | 1 |
| mitoxantrone        | ANTINEOPLASTIC AGENTS (L01)                       | ANTINEOPLASTIC AGENTS (L01)                       | N | 1 |
| molindone           | PSYCHOLEPTICS (N05)                               | PSYCHOLEPTICS (N05)                               | N | 1 |
| nabumetone          | ANTIINFLAMMATORY AND ANTIRHEUMATIC PRODUCTS (M01) | ANTIINFLAMMATORY AND ANTIRHEUMATIC PRODUCTS (M01) | N | 1 |
| nadolol             | BETA BLOCKING AGENTS (C07)                        | BETA BLOCKING AGENTS (C07)                        | N | 1 |

|                  |                                                         |                                                         |   |   |
|------------------|---------------------------------------------------------|---------------------------------------------------------|---|---|
| nicardipine      | CALCIUM CHANNEL BLOCKERS (C08)                          | CALCIUM CHANNEL BLOCKERS (C08)                          | N | 1 |
| nifedipine       | CALCIUM CHANNEL BLOCKERS (C08)                          | CALCIUM CHANNEL BLOCKERS (C08)                          | N | 1 |
| nimodipine       | CALCIUM CHANNEL BLOCKERS (C08)                          | CALCIUM CHANNEL BLOCKERS (C08)                          | N | 1 |
| nitrendipine     | CALCIUM CHANNEL BLOCKERS (C08)                          | CALCIUM CHANNEL BLOCKERS (C08)                          | N | 1 |
| nitrofurantoin   | ANTIBACTERIALS FOR SYSTEMIC USE (J01)                   | ANTIBACTERIALS FOR SYSTEMIC USE (J01)                   | N | 1 |
| nortriptyline    | PSYCHOANALEPTICS (N06)                                  | PSYCHOANALEPTICS (N06)                                  | N | 1 |
| oxaprozin        | ANTIINFLAMMATORY AND ANTIRHEUMATIC PRODUCTS (M01)       | ANTIINFLAMMATORY AND ANTIRHEUMATIC PRODUCTS (M01)       | N | 1 |
| oxprenolol       | BETA BLOCKING AGENTS (C07)                              | BETA BLOCKING AGENTS (C07)                              | N | 1 |
| paroxetine       | PSYCHOANALEPTICS (N06)                                  | PSYCHOANALEPTICS (N06)                                  | N | 1 |
| penbutolol       | BETA BLOCKING AGENTS (C07)                              | BETA BLOCKING AGENTS (C07)                              | N | 1 |
| perphenazine     | PSYCHOLEPTICS (N05)                                     | PSYCHOLEPTICS (N05)                                     | N | 1 |
| pheniramine      | ANTI HISTAMINES FOR SYSTEMIC USE (R06)                  | ANTI HISTAMINES FOR SYSTEMIC USE (R06)                  | N | 1 |
| pimozide         | PSYCHOLEPTICS (N05)                                     | PSYCHOLEPTICS (N05)                                     | N | 1 |
| pindolol         | BETA BLOCKING AGENTS (C07)                              | BETA BLOCKING AGENTS (C07)                              | N | 1 |
| piperacillin     | ANTIBACTERIALS FOR SYSTEMIC USE (J01)                   | ANTIBACTERIALS FOR SYSTEMIC USE (J01)                   | N | 1 |
| piretanide       | DIURETICS (C03)                                         | DIURETICS (C03)                                         | N | 1 |
| pivampicillin    | ANTIBACTERIALS FOR SYSTEMIC USE (J01)                   | ANTIBACTERIALS FOR SYSTEMIC USE (J01)                   | N | 1 |
| pivmecillinam    | ANTIBACTERIALS FOR SYSTEMIC USE (J01)                   | ANTIBACTERIALS FOR SYSTEMIC USE (J01)                   | N | 1 |
| practolol        | BETA BLOCKING AGENTS (C07)                              | BETA BLOCKING AGENTS (C07)                              | N | 1 |
| procarbazine     | ANTINEOPLASTIC AGENTS (L01)                             | ANTINEOPLASTIC AGENTS (L01)                             | N | 1 |
| prochlorperazine | PSYCHOLEPTICS (N05)                                     | PSYCHOLEPTICS (N05)                                     | N | 1 |
| progesterone     | SEX HORMONES AND MODULATORS OF THE GENITAL SYSTEM (G03) | SEX HORMONES AND MODULATORS OF THE GENITAL SYSTEM (G03) | N | 1 |
| propranolol      | BETA BLOCKING AGENTS (C07)                              | BETA BLOCKING AGENTS (C07)                              | N | 1 |
| protriptyline    | PSYCHOANALEPTICS (N06)                                  | PSYCHOANALEPTICS (N06)                                  | N | 1 |
| quinethazone     | DIURETICS (C03)                                         | DIURETICS (C03)                                         | N | 1 |
| repaglinide      | DRUGS USED IN DIABETES (A10)                            | DRUGS USED IN DIABETES (A10)                            | N | 1 |
| rofecoxib        | ANTIINFLAMMATORY AND ANTIRHEUMATIC PRODUCTS (M01)       | ANTIINFLAMMATORY AND ANTIRHEUMATIC PRODUCTS (M01)       | N | 1 |
| roxithromycin    | ANTIBACTERIALS FOR SYSTEMIC USE (J01)                   | ANTIBACTERIALS FOR SYSTEMIC USE (J01)                   | N | 1 |
| simvastatin      | LIPID MODIFYING AGENTS (C10)                            | LIPID MODIFYING AGENTS (C10)                            | N | 1 |
| spectinomycin    | ANTIBACTERIALS FOR SYSTEMIC USE (J01)                   | ANTIBACTERIALS FOR SYSTEMIC USE (J01)                   | N | 1 |
| sulfadimethoxine | ANTIBACTERIALS FOR SYSTEMIC USE (J01)                   | ANTIBACTERIALS FOR SYSTEMIC USE (J01)                   | N | 1 |
| sulfapyridine    | ANTIBACTERIALS FOR SYSTEMIC USE (J01)                   | ANTIBACTERIALS FOR SYSTEMIC USE (J01)                   | N | 1 |
| sulindac         | ANTIINFLAMMATORY AND ANTIRHEUMATIC PRODUCTS (M01)       | ANTIINFLAMMATORY AND ANTIRHEUMATIC PRODUCTS (M01)       | N | 1 |
| sulpiride        | PSYCHOLEPTICS (N05)                                     | PSYCHOLEPTICS (N05)                                     | N | 1 |
| suprofen         | ANTIINFLAMMATORY AND ANTIRHEUMATIC PRODUCTS (M01)       | ANTIINFLAMMATORY AND ANTIRHEUMATIC PRODUCTS (M01)       | N | 1 |
| tenoxicam        | ANTIINFLAMMATORY AND ANTIRHEUMATIC PRODUCTS (M01)       | ANTIINFLAMMATORY AND ANTIRHEUMATIC PRODUCTS (M01)       | N | 1 |
| terfenadine      | ANTI HISTAMINES FOR SYSTEMIC USE (R06)                  | ANTI HISTAMINES FOR SYSTEMIC USE (R06)                  | N | 1 |

|                     |                                                         |                                                         |   |      |
|---------------------|---------------------------------------------------------|---------------------------------------------------------|---|------|
| thiopropazine       | PSYCHOLEPTICS (N05)                                     | PSYCHOLEPTICS (N05)                                     | N | 1    |
| thioridazine        | PSYCHOLEPTICS (N05)                                     | PSYCHOLEPTICS (N05)                                     | N | 1    |
| tiaprofenic_acid    | ANTIINFLAMMATORY AND ANTIRHEUMATIC PRODUCTS (M01)       | ANTIINFLAMMATORY AND ANTIRHEUMATIC PRODUCTS (M01)       | N | 1    |
| ticarcillin         | ANTIBACTERIALS FOR SYSTEMIC USE (J01)                   | ANTIBACTERIALS FOR SYSTEMIC USE (J01)                   | N | 1    |
| tioguanine          | ANTINEOPLASTIC AGENTS (L01)                             | ANTINEOPLASTIC AGENTS (L01)                             | N | 1    |
| torasemide          | DIURETICS (C03)                                         | DIURETICS (C03)                                         | N | 1    |
| trazodone           | PSYCHOANALEPTICS (N06)                                  | PSYCHOANALEPTICS (N06)                                  | N | 1    |
| trichlormethiazide  | DIURETICS (C03)                                         | DIURETICS (C03)                                         | N | 1    |
| trifluoperazine     | PSYCHOLEPTICS (N05)                                     | PSYCHOLEPTICS (N05)                                     | N | 1    |
| triflupromazine     | PSYCHOLEPTICS (N05)                                     | PSYCHOLEPTICS (N05)                                     | N | 1    |
| trimipramine        | PSYCHOANALEPTICS (N06)                                  | PSYCHOANALEPTICS (N06)                                  | N | 1    |
| triprolidine        | ANTIHISTAMINES FOR SYSTEMIC USE (R06)                   | ANTIHISTAMINES FOR SYSTEMIC USE (R06)                   | N | 1    |
| troleandomycin      | ANTIBACTERIALS FOR SYSTEMIC USE (J01)                   | ANTIBACTERIALS FOR SYSTEMIC USE (J01)                   | N | 1    |
| zuclopenthixol      | PSYCHOLEPTICS (N05)                                     | PSYCHOLEPTICS (N05)                                     | N | 1    |
| pergolide           | ANTI-PARKINSON DRUGS (N04)                              | PSYCHOLEPTICS (N05)                                     | Y | 0.99 |
| bendroflumethiazide | DIURETICS (C03)                                         | DIURETICS (C03)                                         | N | 0.99 |
| bezafibrate         | LIPID MODIFYING AGENTS (C10)                            | LIPID MODIFYING AGENTS (C10)                            | N | 0.99 |
| buspirone           | PSYCHOLEPTICS (N05)                                     | PSYCHOLEPTICS (N05)                                     | N | 0.99 |
| clomifene           | SEX HORMONES AND MODULATORS OF THE GENITAL SYSTEM (G03) | SEX HORMONES AND MODULATORS OF THE GENITAL SYSTEM (G03) | N | 0.99 |
| etoposide           | ANTINEOPLASTIC AGENTS (L01)                             | ANTINEOPLASTIC AGENTS (L01)                             | N | 0.99 |
| gemfibrozil         | LIPID MODIFYING AGENTS (C10)                            | LIPID MODIFYING AGENTS (C10)                            | N | 0.99 |
| mexiletine          | CARDIAC THERAPY (C01)                                   | CARDIAC THERAPY (C01)                                   | N | 0.99 |
| midodrine           | CARDIAC THERAPY (C01)                                   | CARDIAC THERAPY (C01)                                   | N | 0.99 |
| propafenone         | CARDIAC THERAPY (C01)                                   | CARDIAC THERAPY (C01)                                   | N | 0.99 |
| quinidine           | CARDIAC THERAPY (C01)                                   | CARDIAC THERAPY (C01)                                   | N | 0.99 |
| remoxipride         | PSYCHOLEPTICS (N05)                                     | PSYCHOLEPTICS (N05)                                     | N | 0.99 |
| risperidone         | PSYCHOLEPTICS (N05)                                     | PSYCHOLEPTICS (N05)                                     | N | 0.99 |
| sulfadiazine        | ANTIBACTERIALS FOR SYSTEMIC USE (J01)                   | ANTIBACTERIALS FOR SYSTEMIC USE (J01)                   | N | 0.99 |
| amiodarone          | CARDIAC THERAPY (C01)                                   | BETA BLOCKING AGENTS (C07)                              | Y | 0.98 |
| nalidixic_acid      | ANTIBACTERIALS FOR SYSTEMIC USE (J01)                   | ANTINEOPLASTIC AGENTS (L01)                             | Y | 0.98 |
| pargyline           | ANTIHYPERTENSIVES (C02)                                 | PSYCHOANALEPTICS (N06)                                  | Y | 0.98 |
| selegiline          | ANTI-PARKINSON DRUGS (N04)                              | PSYCHOANALEPTICS (N06)                                  | Y | 0.98 |
| trifluridine        | OPHTHALMOLOGICALS (S01)                                 | ANTINEOPLASTIC AGENTS (L01)                             | Y | 0.98 |
| trimethoprim        | ANTIBACTERIALS FOR SYSTEMIC USE (J01)                   | ANTIPROTOZOALS (P01)                                    | Y | 0.98 |
| acetohexamide       | DRUGS USED IN DIABETES (A10)                            | DRUGS USED IN DIABETES (A10)                            | N | 0.98 |
| amoxapine           | PSYCHOANALEPTICS (N06)                                  | PSYCHOANALEPTICS (N06)                                  | N | 0.98 |
| mephentermine       | CARDIAC THERAPY (C01)                                   | CARDIAC THERAPY (C01)                                   | N | 0.98 |

|                 |                                                         |                                                         |   |      |
|-----------------|---------------------------------------------------------|---------------------------------------------------------|---|------|
| promazine       | PSYCHOLEPTICS (N05)                                     | PSYCHOLEPTICS (N05)                                     | N | 0.98 |
| raloxifene      | SEX HORMONES AND MODULATORS OF THE GENITAL SYSTEM (G03) | SEX HORMONES AND MODULATORS OF THE GENITAL SYSTEM (G03) | N | 0.98 |
| tolazamide      | DRUGS USED IN DIABETES (A10)                            | DRUGS USED IN DIABETES (A10)                            | N | 0.98 |
| praziquantel    | ANTHELMINTICS (P02)                                     | ANTIEPILEPTICS (N03)                                    | Y | 0.97 |
| vinblastine     | ANTINEOPLASTIC AGENTS (L01)                             | ANTIBACTERIALS FOR SYSTEMIC USE (J01)                   | Y | 0.97 |
| pioglitazone    | DRUGS USED IN DIABETES (A10)                            | DRUGS USED IN DIABETES (A10)                            | N | 0.97 |
| estradiol       | SEX HORMONES AND MODULATORS OF THE GENITAL SYSTEM (G03) | SEX HORMONES AND MODULATORS OF THE GENITAL SYSTEM (G03) | N | 0.96 |
| flecainide      | CARDIAC THERAPY (C01)                                   | CARDIAC THERAPY (C01)                                   | N | 0.96 |
| sotalol         | BETA BLOCKING AGENTS (C07)                              | BETA BLOCKING AGENTS (C07)                              | N | 0.96 |
| altretamine     | ANTINEOPLASTIC AGENTS (L01)                             | ANTINEOPLASTIC AGENTS (L01)                             | N | 0.95 |
| ajmaline        | CARDIAC THERAPY (C01)                                   | CARDIAC THERAPY (C01)                                   | N | 0.94 |
| brompheniramine | ANTIHISTAMINES FOR SYSTEMIC USE (R06)                   | ANTIHISTAMINES FOR SYSTEMIC USE (R06)                   | N | 0.94 |
| chloroquine     | ANTIPROTOZOALS (P01)                                    | ANTIPROTOZOALS (P01)                                    | N | 0.94 |
| trihexyphenidyl | ANTI-PARKINSON DRUGS (N04)                              | ANTI-PARKINSON DRUGS (N04)                              | N | 0.94 |
| nomifensine     | PSYCHOANALEPTICS (N06)                                  | PSYCHOANALEPTICS (N06)                                  | N | 0.93 |
| primidone       | ANTIEPILEPTICS (N03)                                    | ANTIEPILEPTICS (N03)                                    | N | 0.93 |
| proxymetacaine  | OPHTHALMOLOGICALS (S01)                                 | ANTIBACTERIALS FOR SYSTEMIC USE (J01)                   | Y | 0.92 |
| mercaptopurine  | ANTINEOPLASTIC AGENTS (L01)                             | ANTINEOPLASTIC AGENTS (L01)                             | N | 0.92 |
| tacrine         | PSYCHOANALEPTICS (N06)                                  | PSYCHOANALEPTICS (N06)                                  | N | 0.92 |
| biperiden       | ANTI-PARKINSON DRUGS (N04)                              | ANTIHYPERTENSIVES (C02)                                 | Y | 0.91 |
| amrinone        | CARDIAC THERAPY (C01)                                   | CARDIAC THERAPY (C01)                                   | N | 0.91 |
| lymecycline     | ANTIBACTERIALS FOR SYSTEMIC USE (J01)                   | ANTIBACTERIALS FOR SYSTEMIC USE (J01)                   | N | 0.91 |
| mifepristone    | SEX HORMONES AND MODULATORS OF THE GENITAL SYSTEM (G03) | SEX HORMONES AND MODULATORS OF THE GENITAL SYSTEM (G03) | N | 0.91 |
| procyclidine    | ANTI-PARKINSON DRUGS (N04)                              | ANTI-PARKINSON DRUGS (N04)                              | N | 0.91 |
| proguanil       | ANTIPROTOZOALS (P01)                                    | ANTIPROTOZOALS (P01)                                    | N | 0.91 |
| vigabatrin      | ANTIEPILEPTICS (N03)                                    | ANTIEPILEPTICS (N03)                                    | N | 0.91 |
| dopamine        | CARDIAC THERAPY (C01)                                   | ANTI-PARKINSON DRUGS (N04)                              | Y | 0.9  |
| gabapentin      | ANTIEPILEPTICS (N03)                                    | CALCIUM CHANNEL BLOCKERS (C08)                          | Y | 0.9  |
| mecamylamine    | ANTIHYPERTENSIVES (C02)                                 | ANTI-PARKINSON DRUGS (N04)                              | Y | 0.9  |
| memantine       | PSYCHOANALEPTICS (N06)                                  | ANTI-PARKINSON DRUGS (N04)                              | Y | 0.9  |
| pyrimethamine   | ANTIPROTOZOALS (P01)                                    | ANTIBACTERIALS FOR SYSTEMIC USE (J01)                   | Y | 0.9  |
| albendazole     | ANTHELMINTICS (P02)                                     | ANTHELMINTICS (P02)                                     | N | 0.9  |
| cyproterone     | SEX HORMONES AND MODULATORS OF THE GENITAL SYSTEM (G03) | SEX HORMONES AND MODULATORS OF THE GENITAL SYSTEM (G03) | N | 0.9  |
| enoxacin        | ANTIBACTERIALS FOR SYSTEMIC USE (J01)                   | ANTIBACTERIALS FOR SYSTEMIC USE (J01)                   | N | 0.9  |
| mebendazole     | ANTHELMINTICS (P02)                                     | ANTHELMINTICS (P02)                                     | N | 0.9  |
| milrinone       | CARDIAC THERAPY (C01)                                   | CARDIAC THERAPY (C01)                                   | N | 0.9  |
| phenformin      | DRUGS USED IN DIABETES (A10)                            | DRUGS USED IN DIABETES (A10)                            | N | 0.9  |

|                    |                                                         |                                                         |   |      |
|--------------------|---------------------------------------------------------|---------------------------------------------------------|---|------|
| prazosin           | ANTIHYPERTENSIVES (C02)                                 | ANTIHYPERTENSIVES (C02)                                 | N | 0.9  |
| rolitetracycline   | ANTIBACTERIALS FOR SYSTEMIC USE (J01)                   | ANTIBACTERIALS FOR SYSTEMIC USE (J01)                   | N | 0.9  |
| rosiglitazone      | DRUGS USED IN DIABETES (A10)                            | DRUGS USED IN DIABETES (A10)                            | N | 0.9  |
| testosterone       | SEX HORMONES AND MODULATORS OF THE GENITAL SYSTEM (G03) | SEX HORMONES AND MODULATORS OF THE GENITAL SYSTEM (G03) | N | 0.9  |
| trimethadione      | ANTIEPILEPTICS (N03)                                    | ANTIEPILEPTICS (N03)                                    | N | 0.9  |
| azacitidine        | ANTINEOPLASTIC AGENTS (L01)                             | OPHTHALMOLOGICALS (S01)                                 | Y | 0.89 |
| cyclopentolate     | OPHTHALMOLOGICALS (S01)                                 | ANTI-PARKINSON DRUGS (N04)                              | Y | 0.89 |
| hydralazine        | ANTIHYPERTENSIVES (C02)                                 | PSYCHOANALEPTICS (N06)                                  | Y | 0.89 |
| amiloride          | DIURETICS (C03)                                         | DIURETICS (C03)                                         | N | 0.89 |
| amodiaquine        | ANTIPROTOZOALS (P01)                                    | ANTIPROTOZOALS (P01)                                    | N | 0.89 |
| bupropion          | PSYCHOANALEPTICS (N06)                                  | PSYCHOANALEPTICS (N06)                                  | N | 0.89 |
| doxazosin          | ANTIHYPERTENSIVES (C02)                                 | ANTIHYPERTENSIVES (C02)                                 | N | 0.89 |
| ethosuximide       | ANTIEPILEPTICS (N03)                                    | ANTIEPILEPTICS (N03)                                    | N | 0.89 |
| irinotecan         | ANTINEOPLASTIC AGENTS (L01)                             | ANTINEOPLASTIC AGENTS (L01)                             | N | 0.89 |
| metformin          | DRUGS USED IN DIABETES (A10)                            | DRUGS USED IN DIABETES (A10)                            | N | 0.89 |
| primaquine         | ANTIPROTOZOALS (P01)                                    | ANTIPROTOZOALS (P01)                                    | N | 0.89 |
| triamterene        | DIURETICS (C03)                                         | DIURETICS (C03)                                         | N | 0.89 |
| melatonin          | PSYCHOLEPTICS (N05)                                     | ANTIPROTOZOALS (P01)                                    | Y | 0.88 |
| tranylcypromine    | PSYCHOANALEPTICS (N06)                                  | ANTI-PARKINSON DRUGS (N04)                              | Y | 0.88 |
| valproic_acid      | ANTIEPILEPTICS (N03)                                    | ANTIEPILEPTICS (N03)                                    | N | 0.88 |
| verteporfin        | OPHTHALMOLOGICALS (S01)                                 | ANTINEOPLASTIC AGENTS (L01)                             | Y | 0.87 |
| metixene           | ANTI-PARKINSON DRUGS (N04)                              | PSYCHOLEPTICS (N05)                                     | Y | 0.86 |
| sulfamethoxazole   | ANTIBACTERIALS FOR SYSTEMIC USE (J01)                   | OPHTHALMOLOGICALS (S01)                                 | Y | 0.86 |
| tropicamide        | OPHTHALMOLOGICALS (S01)                                 | ANTI-PARKINSON DRUGS (N04)                              | Y | 0.84 |
| diloxanide         | ANTIPROTOZOALS (P01)                                    | ANTIBACTERIALS FOR SYSTEMIC USE (J01)                   | Y | 0.83 |
| levodopa           | ANTI-PARKINSON DRUGS (N04)                              | CARDIAC THERAPY (C01)                                   | Y | 0.81 |
| cinoxacin          | ANTIBACTERIALS FOR SYSTEMIC USE (J01)                   | ANTIBACTERIALS FOR SYSTEMIC USE (J01)                   | N | 0.8  |
| galantamine        | PSYCHOANALEPTICS (N06)                                  | ANTIHYPERTENSIVES (C02)                                 | Y | 0.79 |
| indapamide         | DIURETICS (C03)                                         | DIURETICS (C03)                                         | N | 0.79 |
| tocainide          | CARDIAC THERAPY (C01)                                   | CARDIAC THERAPY (C01)                                   | N | 0.79 |
| diethylcarbamazine | ANTHELMINTICS (P02)                                     | ANTINEOPLASTIC AGENTS (L01)                             | Y | 0.78 |
| levamisole         | ANTHELMINTICS (P02)                                     | DRUGS USED IN DIABETES (A10)                            | Y | 0.78 |
| vorinostat         | ANTINEOPLASTIC AGENTS (L01)                             | LIPID MODIFYING AGENTS (C10)                            | Y | 0.77 |
| ethotoin           | ANTIEPILEPTICS (N03)                                    | CARDIAC THERAPY (C01)                                   | Y | 0.75 |
| amantadine         | ANTI-PARKINSON DRUGS (N04)                              | PSYCHOANALEPTICS (N06)                                  | Y | 0.73 |
| atovaquone         | ANTIPROTOZOALS (P01)                                    | SEX HORMONES AND MODULATORS OF THE GENITAL SYSTEM (G03) | Y | 0.7  |
| procainamide       | CARDIAC THERAPY (C01)                                   | ANTIEPILEPTICS (N03)                                    | Y | 0.7  |

|                |                                       |                                                         |   |      |
|----------------|---------------------------------------|---------------------------------------------------------|---|------|
| labetalol      | BETA BLOCKING AGENTS (C07)            | CARDIAC THERAPY (C01)                                   | Y | 0.69 |
| guanfacine     | ANTIHYPERTENSIVES (C02)               | ANTIEPILEPTICS (N03)                                    | Y | 0.68 |
| imatinib       | ANTINEOPLASTIC AGENTS (L01)           | DIURETICS (C03)                                         | Y | 0.68 |
| reserpine      | ANTIHYPERTENSIVES (C02)               | ANTIHYPERTENSIVES (C02)                                 | N | 0.67 |
| medrysone      | OPHTHALMOLOGICALS (S01)               | SEX HORMONES AND MODULATORS OF THE GENITAL SYSTEM (G03) | Y | 0.66 |
| probucol       | LIPID MODIFYING AGENTS (C10)          | ANTIBACTERIALS FOR SYSTEMIC USE (J01)                   | Y | 0.66 |
| halofantrine   | ANTIPROTOZOALS (P01)                  | ANTIHISTAMINES FOR SYSTEMIC USE (R06)                   | Y | 0.64 |
| mephenytoin    | ANTIEPILEPTICS (N03)                  | ANTIEPILEPTICS (N03)                                    | N | 0.64 |
| streptozocin   | ANTINEOPLASTIC AGENTS (L01)           | ANTIBACTERIALS FOR SYSTEMIC USE (J01)                   | Y | 0.62 |
| clozapine      | PSYCHOLEPTICS (N05)                   | PSYCHOLEPTICS (N05)                                     | N | 0.61 |
| perhexiline    | CALCIUM CHANNEL BLOCKERS (C08)        | ANTI-PARKINSON DRUGS (N04)                              | Y | 0.6  |
| phensuximide   | ANTIEPILEPTICS (N03)                  | ANTIEPILEPTICS (N03)                                    | N | 0.6  |
| cyproheptadine | ANTIHISTAMINES FOR SYSTEMIC USE (R06) | PSYCHOLEPTICS (N05)                                     | Y | 0.59 |
| disopyramide   | CARDIAC THERAPY (C01)                 | ANTIHISTAMINES FOR SYSTEMIC USE (R06)                   | Y | 0.58 |
| verapamil      | CALCIUM CHANNEL BLOCKERS (C08)        | CALCIUM CHANNEL BLOCKERS (C08)                          | N | 0.58 |
| bepidil        | CALCIUM CHANNEL BLOCKERS (C08)        | CALCIUM CHANNEL BLOCKERS (C08)                          | N | 0.56 |
| diltiazem      | CALCIUM CHANNEL BLOCKERS (C08)        | ANTIINFLAMMATORY AND ANTIRHEUMATIC PRODUCTS (M01)       | Y | 0.52 |
| isocarboxazid  | PSYCHOANALEPTICS (N06)                | ANTIBACTERIALS FOR SYSTEMIC USE (J01)                   | Y | 0.52 |
| rescinnamine   | ANTIHYPERTENSIVES (C02)               | ANTIHYPERTENSIVES (C02)                                 | N | 0.52 |
| digoxin        | CARDIAC THERAPY (C01)                 | DIURETICS (C03)                                         | Y | 0.51 |
| mefloquine     | ANTIPROTOZOALS (P01)                  | ANTHELMINTICS (P02)                                     | Y | 0.48 |
| digoxin        | CARDIAC THERAPY (C01)                 | ANTIBACTERIALS FOR SYSTEMIC USE (J01)                   | Y | 0.47 |
| rescinnamine   | ANTIHYPERTENSIVES (C02)               | ANTINEOPLASTIC AGENTS (L01)                             | Y | 0.47 |
| isocarboxazid  | PSYCHOANALEPTICS (N06)                | ANTIHYPERTENSIVES (C02)                                 | Y | 0.45 |
| phenelzine     | PSYCHOANALEPTICS (N06)                | ANTIEPILEPTICS (N03)                                    | Y | 0.42 |
| verapamil      | CALCIUM CHANNEL BLOCKERS (C08)        | CARDIAC THERAPY (C01)                                   | Y | 0.42 |
| bepidil        | CALCIUM CHANNEL BLOCKERS (C08)        | CARDIAC THERAPY (C01)                                   | Y | 0.41 |
| cyproheptadine | ANTIHISTAMINES FOR SYSTEMIC USE (R06) | PSYCHOANALEPTICS (N06)                                  | Y | 0.41 |
| phensuximide   | ANTIEPILEPTICS (N03)                  | ANTIBACTERIALS FOR SYSTEMIC USE (J01)                   | Y | 0.4  |
| clozapine      | PSYCHOLEPTICS (N05)                   | PSYCHOANALEPTICS (N06)                                  | Y | 0.39 |
| streptozocin   | ANTINEOPLASTIC AGENTS (L01)           | ANTINEOPLASTIC AGENTS (L01)                             | N | 0.38 |
| mephenytoin    | ANTIEPILEPTICS (N03)                  | CARDIAC THERAPY (C01)                                   | Y | 0.36 |
| disopyramide   | CARDIAC THERAPY (C01)                 | ANTIEPILEPTICS (N03)                                    | Y | 0.35 |
| medrysone      | OPHTHALMOLOGICALS (S01)               | ANTIBACTERIALS FOR SYSTEMIC USE (J01)                   | Y | 0.34 |
| probucol       | LIPID MODIFYING AGENTS (C10)          | CARDIAC THERAPY (C01)                                   | Y | 0.34 |
| halofantrine   | ANTIPROTOZOALS (P01)                  | CARDIAC THERAPY (C01)                                   | Y | 0.33 |
| diltiazem      | CALCIUM CHANNEL BLOCKERS (C08)        | ANTIBACTERIALS FOR SYSTEMIC USE (J01)                   | Y | 0.32 |

|                  |                                       |                                                   |   |       |
|------------------|---------------------------------------|---------------------------------------------------|---|-------|
| perhexiline      | CALCIUM CHANNEL BLOCKERS (C08)        | ANTIBACTERIALS FOR SYSTEMIC USE (J01)             | Y | 0.32  |
| phenelzine       | PSYCHOANALEPTICS (N06)                | PSYCHOANALEPTICS (N06)                            | N | 0.32  |
| reserpine        | ANTIHYPERTENSIVES (C02)               | ANTIBACTERIALS FOR SYSTEMIC USE (J01)             | Y | 0.31  |
| labetalol        | BETA BLOCKING AGENTS (C07)            | BETA BLOCKING AGENTS (C07)                        | N | 0.31  |
| guanfacine       | ANTIHYPERTENSIVES (C02)               | PSYCHOANALEPTICS (N06)                            | Y | 0.29  |
| imatinib         | ANTINEOPLASTIC AGENTS (L01)           | ANTIBACTERIALS FOR SYSTEMIC USE (J01)             | Y | 0.28  |
| amantadine       | ANTI-PARKINSON DRUGS (N04)            | PSYCHOLEPTICS (N05)                               | Y | 0.27  |
| paclitaxel       | ANTINEOPLASTIC AGENTS (L01)           | ANTIBACTERIALS FOR SYSTEMIC USE (J01)             | Y | 0.27  |
| ethotoin         | ANTIEPILEPTICS (N03)                  | ANTIEPILEPTICS (N03)                              | N | 0.25  |
| mefloquine       | ANTIPROTOZOALS (P01)                  | ANTI-PARKINSON DRUGS (N04)                        | Y | 0.24  |
| diethylcarbazine | ANTHELMINTICS (P02)                   | ANTIINFLAMMATORY AND ANTIRHEUMATIC PRODUCTS (M01) | Y | 0.22  |
| paclitaxel       | ANTINEOPLASTIC AGENTS (L01)           | DIURETICS (C03)                                   | Y | 0.22  |
| phenelzine       | PSYCHOANALEPTICS (N06)                | CARDIAC THERAPY (C01)                             | Y | 0.22  |
| tocainide        | CARDIAC THERAPY (C01)                 | ANTIEPILEPTICS (N03)                              | Y | 0.21  |
| cinoxacin        | ANTIBACTERIALS FOR SYSTEMIC USE (J01) | ANTINEOPLASTIC AGENTS (L01)                       | Y | 0.2   |
| levodopa         | ANTI-PARKINSON DRUGS (N04)            | PSYCHOLEPTICS (N05)                               | Y | 0.19  |
| procainamide     | CARDIAC THERAPY (C01)                 | CARDIAC THERAPY (C01)                             | N | 0.19  |
| vorinostat       | ANTINEOPLASTIC AGENTS (L01)           | ANTINEOPLASTIC AGENTS (L01)                       | N | 0.17  |
| indapamide       | DIURETICS (C03)                       | ANTIBACTERIALS FOR SYSTEMIC USE (J01)             | Y | 0.15  |
| tropicamide      | OPHTHALMOLOGICALS (S01)               | ANTINEOPLASTIC AGENTS (L01)                       | Y | 0.15  |
| sulfamethoxazole | ANTIBACTERIALS FOR SYSTEMIC USE (J01) | ANTIBACTERIALS FOR SYSTEMIC USE (J01)             | N | 0.14  |
| diloxanide       | ANTIPROTOZOALS (P01)                  | DIURETICS (C03)                                   | Y | 0.13  |
| levamisole       | ANTHELMINTICS (P02)                   | ANTIPROTOZOALS (P01)                              | Y | 0.13  |
| paclitaxel       | ANTINEOPLASTIC AGENTS (L01)           | CALCIUM CHANNEL BLOCKERS (C08)                    | Y | 0.13  |
| paclitaxel       | ANTINEOPLASTIC AGENTS (L01)           | ANTIEPILEPTICS (N03)                              | Y | 0.13  |
| atovaquone       | ANTIPROTOZOALS (P01)                  | CARDIAC THERAPY (C01)                             | Y | 0.12  |
| valproic_acid    | ANTIEPILEPTICS (N03)                  | ANTINEOPLASTIC AGENTS (L01)                       | Y | 0.12  |
| paclitaxel       | ANTINEOPLASTIC AGENTS (L01)           | ANTINEOPLASTIC AGENTS (L01)                       | N | 0.12  |
| amiloride        | DIURETICS (C03)                       | ANTIBACTERIALS FOR SYSTEMIC USE (J01)             | Y | 0.11  |
| atovaquone       | ANTIPROTOZOALS (P01)                  | DIURETICS (C03)                                   | Y | 0.11  |
| mefloquine       | ANTIPROTOZOALS (P01)                  | PSYCHOLEPTICS (N05)                               | Y | 0.11  |
| azacitidine      | ANTINEOPLASTIC AGENTS (L01)           | ANTINEOPLASTIC AGENTS (L01)                       | N | 0.11  |
| bupropion        | PSYCHOANALEPTICS (N06)                | CARDIAC THERAPY (C01)                             | Y | 0.1   |
| procainamide     | CARDIAC THERAPY (C01)                 | ANTINEOPLASTIC AGENTS (L01)                       | Y | 0.1   |
| tranlycypromine  | PSYCHOANALEPTICS (N06)                | PSYCHOANALEPTICS (N06)                            | N | 0.1   |
| dopamine         | CARDIAC THERAPY (C01)                 | PSYCHOLEPTICS (N05)                               | Y | 0.098 |
| galantamine      | PSYCHOANALEPTICS (N06)                | ANTINEOPLASTIC AGENTS (L01)                       | Y | 0.098 |

|                |                                                         |                                       |   |       |
|----------------|---------------------------------------------------------|---------------------------------------|---|-------|
| enoxacin       | ANTIBACTERIALS FOR SYSTEMIC USE (J01)                   | ANTINEOPLASTIC AGENTS (L01)           | Y | 0.095 |
| rosiglitazone  | DRUGS USED IN DIABETES (A10)                            | ANTIBACTERIALS FOR SYSTEMIC USE (J01) | Y | 0.095 |
| cyproterone    | SEX HORMONES AND MODULATORS OF THE GENITAL SYSTEM (G03) | DIURETICS (C03)                       | Y | 0.093 |
| proguanil      | ANTIPROTOZOALS (P01)                                    | ANTIBACTERIALS FOR SYSTEMIC USE (J01) | Y | 0.093 |
| pyrimethamine  | ANTIPROTOZOALS (P01)                                    | ANTIPROTOZOALS (P01)                  | N | 0.093 |
| memantine      | PSYCHOANALEPTICS (N06)                                  | ANTIBACTERIALS FOR SYSTEMIC USE (J01) | Y | 0.092 |
| albendazole    | ANTHELMINTICS (P02)                                     | ANTINEOPLASTIC AGENTS (L01)           | Y | 0.089 |
| verteporfin    | OPHTHALMOLOGICALS (S01)                                 | ANTIHYPERTENSIVES (C02)               | Y | 0.088 |
| paclitaxel     | ANTINEOPLASTIC AGENTS (L01)                             | BETA BLOCKING AGENTS (C07)            | Y | 0.087 |
| lymecycline    | ANTIBACTERIALS FOR SYSTEMIC USE (J01)                   | ANTINEOPLASTIC AGENTS (L01)           | Y | 0.086 |
| primaquine     | ANTIPROTOZOALS (P01)                                    | PSYCHOLEPTICS (N05)                   | Y | 0.086 |
| mifepristone   | SEX HORMONES AND MODULATORS OF THE GENITAL SYSTEM (G03) | OPHTHALMOLOGICALS (S01)               | Y | 0.085 |
| metixene       | ANTI-PARKINSON DRUGS (N04)                              | ANTI-PARKINSON DRUGS (N04)            | N | 0.085 |
| amrinone       | CARDIAC THERAPY (C01)                                   | ANTIPROTOZOALS (P01)                  | Y | 0.084 |
| mebendazole    | ANTHELMINTICS (P02)                                     | ANTINEOPLASTIC AGENTS (L01)           | Y | 0.083 |
| testosterone   | SEX HORMONES AND MODULATORS OF THE GENITAL SYSTEM (G03) | DIURETICS (C03)                       | Y | 0.081 |
| vigabatrin     | ANTIEPILEPTICS (N03)                                    | ANTIBACTERIALS FOR SYSTEMIC USE (J01) | Y | 0.08  |
| diltiazem      | CALCIUM CHANNEL BLOCKERS (C08)                          | PSYCHOLEPTICS (N05)                   | Y | 0.078 |
| mecamylamine   | ANTIHYPERTENSIVES (C02)                                 | CALCIUM CHANNEL BLOCKERS (C08)        | Y | 0.078 |
| mefloquine     | ANTIPROTOZOALS (P01)                                    | CARDIAC THERAPY (C01)                 | Y | 0.078 |
| phenformin     | DRUGS USED IN DIABETES (A10)                            | ANTIEPILEPTICS (N03)                  | Y | 0.077 |
| mefloquine     | ANTIPROTOZOALS (P01)                                    | DIURETICS (C03)                       | Y | 0.076 |
| disopyramide   | CARDIAC THERAPY (C01)                                   | CARDIAC THERAPY (C01)                 | N | 0.074 |
| primidone      | ANTIEPILEPTICS (N03)                                    | ANTIBACTERIALS FOR SYSTEMIC USE (J01) | Y | 0.072 |
| hydralazine    | ANTIHYPERTENSIVES (C02)                                 | ANTINEOPLASTIC AGENTS (L01)           | Y | 0.07  |
| melatonin      | PSYCHOLEPTICS (N05)                                     | ANTIBACTERIALS FOR SYSTEMIC USE (J01) | Y | 0.069 |
| biperiden      | ANTI-PARKINSON DRUGS (N04)                              | ANTI-PARKINSON DRUGS (N04)            | N | 0.069 |
| milrinone      | CARDIAC THERAPY (C01)                                   | ANTIPROTOZOALS (P01)                  | Y | 0.068 |
| nomifensine    | PSYCHOANALEPTICS (N06)                                  | ANTIHISTAMINES FOR SYSTEMIC USE (R06) | Y | 0.068 |
| gabapentin     | ANTIEPILEPTICS (N03)                                    | CARDIAC THERAPY (C01)                 | Y | 0.067 |
| indapamide     | DIURETICS (C03)                                         | PSYCHOANALEPTICS (N06)                | Y | 0.067 |
| irinotecan     | ANTINEOPLASTIC AGENTS (L01)                             | OPHTHALMOLOGICALS (S01)               | Y | 0.065 |
| triamterene    | DIURETICS (C03)                                         | ANTIBACTERIALS FOR SYSTEMIC USE (J01) | Y | 0.065 |
| ajmaline       | CARDIAC THERAPY (C01)                                   | ANTIEPILEPTICS (N03)                  | Y | 0.062 |
| chloroquine    | ANTIPROTOZOALS (P01)                                    | CARDIAC THERAPY (C01)                 | Y | 0.06  |
| procyclidine   | ANTI-PARKINSON DRUGS (N04)                              | ANTIHISTAMINES FOR SYSTEMIC USE (R06) | Y | 0.059 |
| proxymetacaine | OPHTHALMOLOGICALS (S01)                                 | ANTINEOPLASTIC AGENTS (L01)           | Y | 0.059 |

|                  |                                                         |                                                   |   |       |
|------------------|---------------------------------------------------------|---------------------------------------------------|---|-------|
| doxazosin        | ANTIHYPERTENSIVES (C02)                                 | PSYCHOANALEPTICS (N06)                            | Y | 0.058 |
| metixene         | ANTI-PARKINSON DRUGS (N04)                              | PSYCHOANALEPTICS (N06)                            | Y | 0.058 |
| rolitetracycline | ANTIBACTERIALS FOR SYSTEMIC USE (J01)                   | ANTINEOPLASTIC AGENTS (L01)                       | Y | 0.057 |
| metformin        | DRUGS USED IN DIABETES (A10)                            | ANTIHYPERTENSIVES (C02)                           | Y | 0.056 |
| brompheniramine  | ANTIHISTAMINES FOR SYSTEMIC USE (R06)                   | CARDIAC THERAPY (C01)                             | Y | 0.055 |
| levamisole       | ANTHELMINTICS (P02)                                     | PSYCHOANALEPTICS (N06)                            | Y | 0.054 |
| altretamine      | ANTINEOPLASTIC AGENTS (L01)                             | ANTIBACTERIALS FOR SYSTEMIC USE (J01)             | Y | 0.05  |
| amodiaquine      | ANTIPROTOZOALS (P01)                                    | DIURETICS (C03)                                   | Y | 0.05  |
| tacrine          | PSYCHOANALEPTICS (N06)                                  | ANTIBACTERIALS FOR SYSTEMIC USE (J01)             | Y | 0.05  |
| trimethadione    | ANTIEPILEPTICS (N03)                                    | CARDIAC THERAPY (C01)                             | Y | 0.049 |
| mercaptapurine   | ANTINEOPLASTIC AGENTS (L01)                             | PSYCHOLEPTICS (N05)                               | Y | 0.047 |
| ethosuximide     | ANTIEPILEPTICS (N03)                                    | ANTINEOPLASTIC AGENTS (L01)                       | Y | 0.045 |
| cyclopentolate   | OPHTHALMOLOGICALS (S01)                                 | ANTIEPILEPTICS (N03)                              | Y | 0.044 |
| ethosuximide     | ANTIEPILEPTICS (N03)                                    | CALCIUM CHANNEL BLOCKERS (C08)                    | Y | 0.044 |
| perhexiline      | CALCIUM CHANNEL BLOCKERS (C08)                          | ANTIPROTOZOALS (P01)                              | Y | 0.044 |
| phenelzine       | PSYCHOANALEPTICS (N06)                                  | ANTIHYPERTENSIVES (C02)                           | Y | 0.043 |
| triamterene      | DIURETICS (C03)                                         | ANTINEOPLASTIC AGENTS (L01)                       | Y | 0.041 |
| flecainide       | CARDIAC THERAPY (C01)                                   | PSYCHOLEPTICS (N05)                               | Y | 0.039 |
| rolitetracycline | ANTIBACTERIALS FOR SYSTEMIC USE (J01)                   | PSYCHOANALEPTICS (N06)                            | Y | 0.039 |
| galantamine      | PSYCHOANALEPTICS (N06)                                  | CARDIAC THERAPY (C01)                             | Y | 0.038 |
| hydralazine      | ANTIHYPERTENSIVES (C02)                                 | OPHTHALMOLOGICALS (S01)                           | Y | 0.036 |
| metformin        | DRUGS USED IN DIABETES (A10)                            | ANTIBACTERIALS FOR SYSTEMIC USE (J01)             | Y | 0.036 |
| prazosin         | ANTIHYPERTENSIVES (C02)                                 | ANTIBACTERIALS FOR SYSTEMIC USE (J01)             | Y | 0.036 |
| trimethadione    | ANTIEPILEPTICS (N03)                                    | OPHTHALMOLOGICALS (S01)                           | Y | 0.036 |
| amodiaquine      | ANTIPROTOZOALS (P01)                                    | ANTIBACTERIALS FOR SYSTEMIC USE (J01)             | Y | 0.035 |
| cyclopentolate   | OPHTHALMOLOGICALS (S01)                                 | ANTIHISTAMINES FOR SYSTEMIC USE (R06)             | Y | 0.035 |
| perhexiline      | CALCIUM CHANNEL BLOCKERS (C08)                          | ANTHELMINTICS (P02)                               | Y | 0.035 |
| galantamine      | PSYCHOANALEPTICS (N06)                                  | DIURETICS (C03)                                   | Y | 0.033 |
| atovaquone       | ANTIPROTOZOALS (P01)                                    | ANTHELMINTICS (P02)                               | Y | 0.032 |
| estradiol        | SEX HORMONES AND MODULATORS OF THE GENITAL SYSTEM (G03) | CARDIAC THERAPY (C01)                             | Y | 0.032 |
| tacrine          | PSYCHOANALEPTICS (N06)                                  | ANTIINFLAMMATORY AND ANTIRHEUMATIC PRODUCTS (M01) | Y | 0.031 |
| trihexyphenidyl  | ANTI-PARKINSON DRUGS (N04)                              | PSYCHOANALEPTICS (N06)                            | Y | 0.031 |
| prazosin         | ANTIHYPERTENSIVES (C02)                                 | PSYCHOANALEPTICS (N06)                            | Y | 0.03  |
| vorinostat       | ANTINEOPLASTIC AGENTS (L01)                             | ANTHELMINTICS (P02)                               | Y | 0.03  |
| pioglitazone     | DRUGS USED IN DIABETES (A10)                            | ANTIBACTERIALS FOR SYSTEMIC USE (J01)             | Y | 0.029 |
| digoxin          | CARDIAC THERAPY (C01)                                   | ANTHELMINTICS (P02)                               | Y | 0.028 |
| doxazosin        | ANTIHYPERTENSIVES (C02)                                 | ANTIBACTERIALS FOR SYSTEMIC USE (J01)             | Y | 0.028 |

|                 |                                                         |                                                         |   |       |
|-----------------|---------------------------------------------------------|---------------------------------------------------------|---|-------|
| irinotecan      | ANTINEOPLASTIC AGENTS (L01)                             | ANTIHYPERTENSIVES (C02)                                 | Y | 0.028 |
| melatonin       | PSYCHOLEPTICS (N05)                                     | CARDIAC THERAPY (C01)                                   | Y | 0.028 |
| sotalol         | BETA BLOCKING AGENTS (C07)                              | ANTIBACTERIALS FOR SYSTEMIC USE (J01)                   | Y | 0.028 |
| paclitaxel      | ANTINEOPLASTIC AGENTS (L01)                             | ANTHELMINTICS (P02)                                     | Y | 0.027 |
| galantamine     | PSYCHOANALEPTICS (N06)                                  | PSYCHOANALEPTICS (N06)                                  | N | 0.027 |
| prazosin        | ANTIHYPERTENSIVES (C02)                                 | ANTIPROTOZOALS (P01)                                    | Y | 0.026 |
| gabapentin      | ANTIEPILEPTICS (N03)                                    | ANTIEPILEPTICS (N03)                                    | N | 0.026 |
| diltiazem       | CALCIUM CHANNEL BLOCKERS (C08)                          | DIURETICS (C03)                                         | Y | 0.024 |
| imatinib        | ANTINEOPLASTIC AGENTS (L01)                             | ANTINEOPLASTIC AGENTS (L01)                             | N | 0.024 |
| cyclopentolate  | OPHTHALMOLOGICALS (S01)                                 | ANTIBACTERIALS FOR SYSTEMIC USE (J01)                   | Y | 0.023 |
| proxymetacaine  | OPHTHALMOLOGICALS (S01)                                 | CARDIAC THERAPY (C01)                                   | Y | 0.023 |
| verteporfin     | OPHTHALMOLOGICALS (S01)                                 | SEX HORMONES AND MODULATORS OF THE GENITAL SYSTEM (G03) | Y | 0.023 |
| diltiazem       | CALCIUM CHANNEL BLOCKERS (C08)                          | CARDIAC THERAPY (C01)                                   | Y | 0.021 |
| guanfacine      | ANTIHYPERTENSIVES (C02)                                 | PSYCHOLEPTICS (N05)                                     | Y | 0.021 |
| halofantrine    | ANTIPROTOZOALS (P01)                                    | ANTIHYPERTENSIVES (C02)                                 | Y | 0.021 |
| isocarboxazid   | PSYCHOANALEPTICS (N06)                                  | PSYCHOANALEPTICS (N06)                                  | N | 0.021 |
| atovaquone      | ANTIPROTOZOALS (P01)                                    | PSYCHOANALEPTICS (N06)                                  | Y | 0.02  |
| doxazosin       | ANTIHYPERTENSIVES (C02)                                 | ANTINEOPLASTIC AGENTS (L01)                             | Y | 0.02  |
| metformin       | DRUGS USED IN DIABETES (A10)                            | ANTINEOPLASTIC AGENTS (L01)                             | Y | 0.02  |
| imatinib        | ANTINEOPLASTIC AGENTS (L01)                             | ANTIHYPERTENSIVES (C02)                                 | Y | 0.019 |
| raloxifene      | SEX HORMONES AND MODULATORS OF THE GENITAL SYSTEM (G03) | ANTIBACTERIALS FOR SYSTEMIC USE (J01)                   | Y | 0.019 |
| trifluridine    | OPHTHALMOLOGICALS (S01)                                 | ANTIBACTERIALS FOR SYSTEMIC USE (J01)                   | Y | 0.019 |
| nalidixic_acid  | ANTIBACTERIALS FOR SYSTEMIC USE (J01)                   | ANTIBACTERIALS FOR SYSTEMIC USE (J01)                   | N | 0.019 |
| diloxanide      | ANTIPROTOZOALS (P01)                                    | CARDIAC THERAPY (C01)                                   | Y | 0.018 |
| selegiline      | ANTI-PARKINSON DRUGS (N04)                              | ANTIHYPERTENSIVES (C02)                                 | Y | 0.017 |
| trimethadione   | ANTIEPILEPTICS (N03)                                    | ANTIBACTERIALS FOR SYSTEMIC USE (J01)                   | Y | 0.017 |
| mephentermine   | CARDIAC THERAPY (C01)                                   | PSYCHOANALEPTICS (N06)                                  | Y | 0.016 |
| procyclidine    | ANTI-PARKINSON DRUGS (N04)                              | OPHTHALMOLOGICALS (S01)                                 | Y | 0.016 |
| galantamine     | PSYCHOANALEPTICS (N06)                                  | ANTHELMINTICS (P02)                                     | Y | 0.015 |
| irinotecan      | ANTINEOPLASTIC AGENTS (L01)                             | ANTIBACTERIALS FOR SYSTEMIC USE (J01)                   | Y | 0.015 |
| melatonin       | PSYCHOLEPTICS (N05)                                     | SEX HORMONES AND MODULATORS OF THE GENITAL SYSTEM (G03) | Y | 0.015 |
| praziquantel    | ANTHELMINTICS (P02)                                     | PSYCHOLEPTICS (N05)                                     | Y | 0.015 |
| tranlycypromine | PSYCHOANALEPTICS (N06)                                  | ANTIHYPERTENSIVES (C02)                                 | Y | 0.015 |
| trihexyphenidyl | ANTI-PARKINSON DRUGS (N04)                              | OPHTHALMOLOGICALS (S01)                                 | Y | 0.015 |
| verteporfin     | OPHTHALMOLOGICALS (S01)                                 | ANTHELMINTICS (P02)                                     | Y | 0.015 |
| vigabatrin      | ANTIEPILEPTICS (N03)                                    | PSYCHOANALEPTICS (N06)                                  | Y | 0.015 |
| vinblastine     | ANTINEOPLASTIC AGENTS (L01)                             | CARDIAC THERAPY (C01)                                   | Y | 0.015 |

|                     |                                                         |                                                   |   |        |
|---------------------|---------------------------------------------------------|---------------------------------------------------|---|--------|
| amodiaquine         | ANTIPROTOZOALS (P01)                                    | CARDIAC THERAPY (C01)                             | Y | 0.014  |
| bepiridil           | CALCIUM CHANNEL BLOCKERS (C08)                          | PSYCHOLEPTICS (N05)                               | Y | 0.014  |
| mecamylamine        | ANTIHYPERTENSIVES (C02)                                 | ANTIBACTERIALS FOR SYSTEMIC USE (J01)             | Y | 0.014  |
| mercaptopurine      | ANTINEOPLASTIC AGENTS (L01)                             | OPHTHALMOLOGICALS (S01)                           | Y | 0.014  |
| milrinone           | CARDIAC THERAPY (C01)                                   | ANTIBACTERIALS FOR SYSTEMIC USE (J01)             | Y | 0.014  |
| pargyline           | ANTIHYPERTENSIVES (C02)                                 | ANTI-PARKINSON DRUGS (N04)                        | Y | 0.014  |
| testosterone        | SEX HORMONES AND MODULATORS OF THE GENITAL SYSTEM (G03) | CARDIAC THERAPY (C01)                             | Y | 0.014  |
| amoxapine           | PSYCHOANALEPTICS (N06)                                  | PSYCHOLEPTICS (N05)                               | Y | 0.013  |
| atovaquone          | ANTIPROTOZOALS (P01)                                    | ANTIBACTERIALS FOR SYSTEMIC USE (J01)             | Y | 0.013  |
| bezafibrate         | LIPID MODIFYING AGENTS (C10)                            | DRUGS USED IN DIABETES (A10)                      | Y | 0.013  |
| diltiazem           | CALCIUM CHANNEL BLOCKERS (C08)                          | OPHTHALMOLOGICALS (S01)                           | Y | 0.013  |
| ethosuximide        | ANTIEPILEPTICS (N03)                                    | ANTIBACTERIALS FOR SYSTEMIC USE (J01)             | Y | 0.013  |
| promazine           | PSYCHOLEPTICS (N05)                                     | PSYCHOANALEPTICS (N06)                            | Y | 0.013  |
| reserpine           | ANTIHYPERTENSIVES (C02)                                 | CARDIAC THERAPY (C01)                             | Y | 0.013  |
| vinblastine         | ANTINEOPLASTIC AGENTS (L01)                             | ANTHELMINTICS (P02)                               | Y | 0.013  |
| trimethoprim        | ANTIBACTERIALS FOR SYSTEMIC USE (J01)                   | ANTIBACTERIALS FOR SYSTEMIC USE (J01)             | N | 0.013  |
| guanfacine          | ANTIHYPERTENSIVES (C02)                                 | ANTINEOPLASTIC AGENTS (L01)                       | Y | 0.012  |
| levamisole          | ANTHELMINTICS (P02)                                     | CARDIAC THERAPY (C01)                             | Y | 0.012  |
| mexiletine          | CARDIAC THERAPY (C01)                                   | BETA BLOCKING AGENTS (C07)                        | Y | 0.012  |
| milrinone           | CARDIAC THERAPY (C01)                                   | OPHTHALMOLOGICALS (S01)                           | Y | 0.012  |
| phenformin          | DRUGS USED IN DIABETES (A10)                            | ANTHELMINTICS (P02)                               | Y | 0.012  |
| vorinostat          | ANTINEOPLASTIC AGENTS (L01)                             | ANTIEPILEPTICS (N03)                              | Y | 0.012  |
| diltiazem           | CALCIUM CHANNEL BLOCKERS (C08)                          | CALCIUM CHANNEL BLOCKERS (C08)                    | N | 0.012  |
| tolazamide          | DRUGS USED IN DIABETES (A10)                            | ANTIBACTERIALS FOR SYSTEMIC USE (J01)             | Y | 0.011  |
| tropicamide         | OPHTHALMOLOGICALS (S01)                                 | CARDIAC THERAPY (C01)                             | Y | 0.011  |
| mefloquine          | ANTIPROTOZOALS (P01)                                    | ANTINEOPLASTIC AGENTS (L01)                       | Y | 0.01   |
| mercaptopurine      | ANTINEOPLASTIC AGENTS (L01)                             | ANTIINFLAMMATORY AND ANTIRHEUMATIC PRODUCTS (M01) | Y | 0.01   |
| vorinostat          | ANTINEOPLASTIC AGENTS (L01)                             | CARDIAC THERAPY (C01)                             | Y | 0.01   |
| isocarboxazid       | PSYCHOANALEPTICS (N06)                                  | ANTI-PARKINSON DRUGS (N04)                        | Y | 0.0098 |
| bendroflumethiazide | DIURETICS (C03)                                         | ANTIBACTERIALS FOR SYSTEMIC USE (J01)             | Y | 0.0097 |
| procyclidine        | ANTI-PARKINSON DRUGS (N04)                              | CARDIAC THERAPY (C01)                             | Y | 0.0095 |
| reserpine           | ANTIHYPERTENSIVES (C02)                                 | PSYCHOLEPTICS (N05)                               | Y | 0.0095 |
| mebendazole         | ANTHELMINTICS (P02)                                     | ANTIHISTAMINES FOR SYSTEMIC USE (R06)             | Y | 0.0094 |
| midodrine           | CARDIAC THERAPY (C01)                                   | PSYCHOLEPTICS (N05)                               | Y | 0.0094 |
| diltiazem           | CALCIUM CHANNEL BLOCKERS (C08)                          | ANTINEOPLASTIC AGENTS (L01)                       | Y | 0.0092 |
| etoposide           | ANTINEOPLASTIC AGENTS (L01)                             | ANTIBACTERIALS FOR SYSTEMIC USE (J01)             | Y | 0.0091 |
| amiodarone          | CARDIAC THERAPY (C01)                                   | CARDIAC THERAPY (C01)                             | N | 0.0088 |

|                 |                                                         |                                       |   |        |
|-----------------|---------------------------------------------------------|---------------------------------------|---|--------|
| bepriidil       | CALCIUM CHANNEL BLOCKERS (C08)                          | ANTIPROTOZOALS (P01)                  | Y | 0.0085 |
| sotalol         | BETA BLOCKING AGENTS (C07)                              | CARDIAC THERAPY (C01)                 | Y | 0.0083 |
| valproic_acid   | ANTIEPILEPTICS (N03)                                    | PSYCHOLEPTICS (N05)                   | Y | 0.0083 |
| biperiden       | ANTI-PARKINSON DRUGS (N04)                              | ANTIBACTERIALS FOR SYSTEMIC USE (J01) | Y | 0.0081 |
| biperiden       | ANTI-PARKINSON DRUGS (N04)                              | ANTIHISTAMINES FOR SYSTEMIC USE (R06) | Y | 0.0081 |
| levamisole      | ANTHELMINTICS (P02)                                     | ANTIBACTERIALS FOR SYSTEMIC USE (J01) | Y | 0.0081 |
| clomifene       | SEX HORMONES AND MODULATORS OF THE GENITAL SYSTEM (G03) | ANTIBACTERIALS FOR SYSTEMIC USE (J01) | Y | 0.0075 |
| praziquantel    | ANTHELMINTICS (P02)                                     | PSYCHOANALEPTICS (N06)                | Y | 0.0075 |
| prazosin        | ANTIHYPERTENSIVES (C02)                                 | CARDIAC THERAPY (C01)                 | Y | 0.0075 |
| promazine       | PSYCHOLEPTICS (N05)                                     | ANTIHISTAMINES FOR SYSTEMIC USE (R06) | Y | 0.0075 |
| primaquine      | ANTIPROTOZOALS (P01)                                    | CARDIAC THERAPY (C01)                 | Y | 0.0074 |
| primaquine      | ANTIPROTOZOALS (P01)                                    | ANTINEOPLASTIC AGENTS (L01)           | Y | 0.0074 |
| remoxipride     | PSYCHOLEPTICS (N05)                                     | CARDIAC THERAPY (C01)                 | Y | 0.0068 |
| diloxanide      | ANTIPROTOZOALS (P01)                                    | ANTI-PARKINSON DRUGS (N04)            | Y | 0.0067 |
| mercaptapurine  | ANTINEOPLASTIC AGENTS (L01)                             | CARDIAC THERAPY (C01)                 | Y | 0.0066 |
| cyclopentolate  | OPHTHALMOLOGICALS (S01)                                 | PSYCHOANALEPTICS (N06)                | Y | 0.0065 |
| amodiaquine     | ANTIPROTOZOALS (P01)                                    | PSYCHOLEPTICS (N05)                   | Y | 0.0063 |
| pergolide       | ANTI-PARKINSON DRUGS (N04)                              | PSYCHOANALEPTICS (N06)                | Y | 0.0063 |
| tolazamide      | DRUGS USED IN DIABETES (A10)                            | PSYCHOLEPTICS (N05)                   | Y | 0.0063 |
| lymecycline     | ANTIBACTERIALS FOR SYSTEMIC USE (J01)                   | PSYCHOANALEPTICS (N06)                | Y | 0.0062 |
| propafenone     | CARDIAC THERAPY (C01)                                   | BETA BLOCKING AGENTS (C07)            | Y | 0.0062 |
| amiodarone      | CARDIAC THERAPY (C01)                                   | CALCIUM CHANNEL BLOCKERS (C08)        | Y | 0.0059 |
| buspirone       | PSYCHOLEPTICS (N05)                                     | BETA BLOCKING AGENTS (C07)            | Y | 0.0058 |
| diloxanide      | ANTIPROTOZOALS (P01)                                    | ANTIEPILEPTICS (N03)                  | Y | 0.0058 |
| triamterene     | DIURETICS (C03)                                         | OPHTHALMOLOGICALS (S01)               | Y | 0.0058 |
| trihexyphenidyl | ANTI-PARKINSON DRUGS (N04)                              | CARDIAC THERAPY (C01)                 | Y | 0.0058 |
| halofantrine    | ANTIPROTOZOALS (P01)                                    | PSYCHOLEPTICS (N05)                   | Y | 0.0056 |
| mephentermine   | CARDIAC THERAPY (C01)                                   | ANTIBACTERIALS FOR SYSTEMIC USE (J01) | Y | 0.0056 |
| quinidine       | CARDIAC THERAPY (C01)                                   | ANTIPROTOZOALS (P01)                  | Y | 0.0056 |
| rescinnamine    | ANTIHYPERTENSIVES (C02)                                 | PSYCHOLEPTICS (N05)                   | Y | 0.0056 |
| sulfadiazine    | ANTIBACTERIALS FOR SYSTEMIC USE (J01)                   | ANTINEOPLASTIC AGENTS (L01)           | Y | 0.0056 |
| biperiden       | ANTI-PARKINSON DRUGS (N04)                              | OPHTHALMOLOGICALS (S01)               | Y | 0.0054 |
| levamisole      | ANTHELMINTICS (P02)                                     | DIURETICS (C03)                       | Y | 0.0054 |
| memantine       | PSYCHOANALEPTICS (N06)                                  | DIURETICS (C03)                       | Y | 0.0054 |
| acetohexamide   | DRUGS USED IN DIABETES (A10)                            | ANTIBACTERIALS FOR SYSTEMIC USE (J01) | Y | 0.0053 |
| diloxanide      | ANTIPROTOZOALS (P01)                                    | BETA BLOCKING AGENTS (C07)            | Y | 0.0048 |
| diloxanide      | ANTIPROTOZOALS (P01)                                    | ANTIHYPERTENSIVES (C02)               | Y | 0.0048 |

|                 |                                                         |                                                   |   |        |
|-----------------|---------------------------------------------------------|---------------------------------------------------|---|--------|
| spironolactone  | DIURETICS (C03)                                         | ANTIINFLAMMATORY AND ANTIRHEUMATIC PRODUCTS (M01) | Y | 0.0048 |
| gemfibrozil     | LIPID MODIFYING AGENTS (C10)                            | ANTIBACTERIALS FOR SYSTEMIC USE (J01)             | Y | 0.0047 |
| mebendazole     | ANTHELMINTICS (P02)                                     | ANTIBACTERIALS FOR SYSTEMIC USE (J01)             | Y | 0.0047 |
| mefloquine      | ANTIPROTOZOALS (P01)                                    | CALCIUM CHANNEL BLOCKERS (C08)                    | Y | 0.0047 |
| minaprine       | PSYCHOANALEPTICS (N06)                                  | PSYCHOLEPTICS (N05)                               | Y | 0.0047 |
| phenformin      | DRUGS USED IN DIABETES (A10)                            | ANTINEOPLASTIC AGENTS (L01)                       | Y | 0.0047 |
| risperidone     | PSYCHOLEPTICS (N05)                                     | PSYCHOANALEPTICS (N06)                            | Y | 0.0047 |
| albendazole     | ANTHELMINTICS (P02)                                     | ANTIHISTAMINES FOR SYSTEMIC USE (R06)             | Y | 0.0046 |
| flecainide      | CARDIAC THERAPY (C01)                                   | ANTIEPILEPTICS (N03)                              | Y | 0.0046 |
| mecamylamine    | ANTIHYPERTENSIVES (C02)                                 | ANTINEOPLASTIC AGENTS (L01)                       | Y | 0.0046 |
| primaquine      | ANTIPROTOZOALS (P01)                                    | ANTIHISTAMINES FOR SYSTEMIC USE (R06)             | Y | 0.0046 |
| biperiden       | ANTI-PARKINSON DRUGS (N04)                              | CARDIAC THERAPY (C01)                             | Y | 0.0045 |
| carbamazepine   | ANTIEPILEPTICS (N03)                                    | ANTIEPILEPTICS (N03)                              | N | 0.0044 |
| estradiol       | SEX HORMONES AND MODULATORS OF THE GENITAL SYSTEM (G03) | ANTIBACTERIALS FOR SYSTEMIC USE (J01)             | Y | 0.0038 |
| melatonin       | PSYCHOLEPTICS (N05)                                     | ANTIEPILEPTICS (N03)                              | Y | 0.0038 |
| reserpine       | ANTIHYPERTENSIVES (C02)                                 | LIPID MODIFYING AGENTS (C10)                      | Y | 0.0038 |
| testosterone    | SEX HORMONES AND MODULATORS OF THE GENITAL SYSTEM (G03) | ANTIINFLAMMATORY AND ANTIRHEUMATIC PRODUCTS (M01) | Y | 0.0038 |
| trihexyphenidyl | ANTI-PARKINSON DRUGS (N04)                              | ANTIHISTAMINES FOR SYSTEMIC USE (R06)             | Y | 0.0038 |
| phenformin      | DRUGS USED IN DIABETES (A10)                            | OPHTHALMOLOGICALS (S01)                           | Y | 0.0037 |
| phenformin      | DRUGS USED IN DIABETES (A10)                            | ANTIHYPERTENSIVES (C02)                           | Y | 0.0037 |
| simvastatin     | LIPID MODIFYING AGENTS (C10)                            | PSYCHOANALEPTICS (N06)                            | Y | 0.0037 |
| amodiaquine     | ANTIPROTOZOALS (P01)                                    | ANTINEOPLASTIC AGENTS (L01)                       | Y | 0.0036 |
| nitrofurantoin  | ANTIBACTERIALS FOR SYSTEMIC USE (J01)                   | ANTIEPILEPTICS (N03)                              | Y | 0.0036 |
| pargyline       | ANTIHYPERTENSIVES (C02)                                 | ANTINEOPLASTIC AGENTS (L01)                       | Y | 0.0036 |
| acetohexamide   | DRUGS USED IN DIABETES (A10)                            | PSYCHOLEPTICS (N05)                               | Y | 0.0035 |
| vorinostat      | ANTINEOPLASTIC AGENTS (L01)                             | ANTIPROTOZOALS (P01)                              | Y | 0.0035 |
| fluvastatin     | LIPID MODIFYING AGENTS (C10)                            | ANTINEOPLASTIC AGENTS (L01)                       | Y | 0.003  |
| galantamine     | PSYCHOANALEPTICS (N06)                                  | ANTI-PARKINSON DRUGS (N04)                        | Y | 0.003  |
| bupropion       | PSYCHOANALEPTICS (N06)                                  | ANTIHISTAMINES FOR SYSTEMIC USE (R06)             | Y | 0.0029 |
| hydralazine     | ANTIHYPERTENSIVES (C02)                                 | ANTIBACTERIALS FOR SYSTEMIC USE (J01)             | Y | 0.0029 |
| bepridil        | CALCIUM CHANNEL BLOCKERS (C08)                          | BETA BLOCKING AGENTS (C07)                        | Y | 0.0028 |
| brinzolamide    | OPHTHALMOLOGICALS (S01)                                 | DIURETICS (C03)                                   | Y | 0.0028 |
| cyproterone     | SEX HORMONES AND MODULATORS OF THE GENITAL SYSTEM (G03) | ANTIBACTERIALS FOR SYSTEMIC USE (J01)             | Y | 0.0028 |
| diltiazem       | CALCIUM CHANNEL BLOCKERS (C08)                          | DRUGS USED IN DIABETES (A10)                      | Y | 0.0028 |
| ethosuximide    | ANTIEPILEPTICS (N03)                                    | OPHTHALMOLOGICALS (S01)                           | Y | 0.0028 |
| fluoxetine      | PSYCHOANALEPTICS (N06)                                  | PSYCHOLEPTICS (N05)                               | Y | 0.0028 |
| gabapentin      | ANTIEPILEPTICS (N03)                                    | PSYCHOANALEPTICS (N06)                            | Y | 0.0028 |

|                     |                                                         |                                                   |   |        |
|---------------------|---------------------------------------------------------|---------------------------------------------------|---|--------|
| mefloquine          | ANTIPROTOZOALS (P01)                                    | ANTIHISTAMINES FOR SYSTEMIC USE (R06)             | Y | 0.0028 |
| perhexiline         | CALCIUM CHANNEL BLOCKERS (C08)                          | CARDIAC THERAPY (C01)                             | Y | 0.0028 |
| procyclidine        | ANTI-PARKINSON DRUGS (N04)                              | ANTIPROTOZOALS (P01)                              | Y | 0.0028 |
| risperidone         | PSYCHOLEPTICS (N05)                                     | ANTI-PARKINSON DRUGS (N04)                        | Y | 0.0028 |
| risperidone         | PSYCHOLEPTICS (N05)                                     | ANTIEPILEPTICS (N03)                              | Y | 0.0028 |
| tacrine             | PSYCHOANALEPTICS (N06)                                  | CARDIAC THERAPY (C01)                             | Y | 0.0028 |
| testosterone        | SEX HORMONES AND MODULATORS OF THE GENITAL SYSTEM (G03) | ANTIBACTERIALS FOR SYSTEMIC USE (J01)             | Y | 0.0028 |
| acetohexamide       | DRUGS USED IN DIABETES (A10)                            | ANTINEOPLASTIC AGENTS (L01)                       | Y | 0.0027 |
| albendazole         | ANTHELMINTICS (P02)                                     | PSYCHOLEPTICS (N05)                               | Y | 0.0027 |
| brompheniramine     | ANTIHISTAMINES FOR SYSTEMIC USE (R06)                   | PSYCHOANALEPTICS (N06)                            | Y | 0.0027 |
| tolazamide          | DRUGS USED IN DIABETES (A10)                            | CARDIAC THERAPY (C01)                             | Y | 0.0027 |
| vorinostat          | ANTINEOPLASTIC AGENTS (L01)                             | ANTIHISTAMINES FOR SYSTEMIC USE (R06)             | Y | 0.0026 |
| amiodarone          | CARDIAC THERAPY (C01)                                   | ANTIHYPERTENSIVES (C02)                           | Y | 0.002  |
| amoxapine           | PSYCHOANALEPTICS (N06)                                  | CARDIAC THERAPY (C01)                             | Y | 0.002  |
| bendroflumethiazide | DIURETICS (C03)                                         | OPHTHALMOLOGICALS (S01)                           | Y | 0.0019 |
| bupirone            | PSYCHOLEPTICS (N05)                                     | ANTIBACTERIALS FOR SYSTEMIC USE (J01)             | Y | 0.0019 |
| cinoxacin           | ANTIBACTERIALS FOR SYSTEMIC USE (J01)                   | PSYCHOANALEPTICS (N06)                            | Y | 0.0019 |
| clozapine           | PSYCHOLEPTICS (N05)                                     | ANTIBACTERIALS FOR SYSTEMIC USE (J01)             | Y | 0.0019 |
| hydralazine         | ANTIHYPERTENSIVES (C02)                                 | ANTIPROTOZOALS (P01)                              | Y | 0.0019 |
| lovastatin          | LIPID MODIFYING AGENTS (C10)                            | ANTINEOPLASTIC AGENTS (L01)                       | Y | 0.0019 |
| lovastatin          | LIPID MODIFYING AGENTS (C10)                            | PSYCHOANALEPTICS (N06)                            | Y | 0.0019 |
| mebendazole         | ANTHELMINTICS (P02)                                     | PSYCHOLEPTICS (N05)                               | Y | 0.0019 |
| mercaptapurine      | ANTINEOPLASTIC AGENTS (L01)                             | PSYCHOANALEPTICS (N06)                            | Y | 0.0019 |
| methazolamide       | OPHTHALMOLOGICALS (S01)                                 | PSYCHOANALEPTICS (N06)                            | Y | 0.0019 |
| metolazone          | DIURETICS (C03)                                         | ANTIBACTERIALS FOR SYSTEMIC USE (J01)             | Y | 0.0019 |
| mifepristone        | SEX HORMONES AND MODULATORS OF THE GENITAL SYSTEM (G03) | ANTHELMINTICS (P02)                               | Y | 0.0019 |
| paclitaxel          | ANTINEOPLASTIC AGENTS (L01)                             | ANTIPROTOZOALS (P01)                              | Y | 0.0019 |
| procainamide        | CARDIAC THERAPY (C01)                                   | PSYCHOLEPTICS (N05)                               | Y | 0.0019 |
| pyrimethamine       | ANTIPROTOZOALS (P01)                                    | PSYCHOLEPTICS (N05)                               | Y | 0.0019 |
| risperidone         | PSYCHOLEPTICS (N05)                                     | ANTIBACTERIALS FOR SYSTEMIC USE (J01)             | Y | 0.0019 |
| rolitetracycline    | ANTIBACTERIALS FOR SYSTEMIC USE (J01)                   | OPHTHALMOLOGICALS (S01)                           | Y | 0.0019 |
| sulpiride           | PSYCHOLEPTICS (N05)                                     | DIURETICS (C03)                                   | Y | 0.0019 |
| terfenadine         | ANTIHISTAMINES FOR SYSTEMIC USE (R06)                   | CARDIAC THERAPY (C01)                             | Y | 0.0019 |
| triamterene         | DIURETICS (C03)                                         | ANTIPROTOZOALS (P01)                              | Y | 0.0019 |
| acetohexamide       | DRUGS USED IN DIABETES (A10)                            | OPHTHALMOLOGICALS (S01)                           | Y | 0.0018 |
| brompheniramine     | ANTIHISTAMINES FOR SYSTEMIC USE (R06)                   | ANTI-PARKINSON DRUGS (N04)                        | Y | 0.0018 |
| cyproterone         | SEX HORMONES AND MODULATORS OF THE GENITAL SYSTEM (G03) | ANTIINFLAMMATORY AND ANTIRHEUMATIC PRODUCTS (M01) | Y | 0.0018 |

|                     |                                                         |                                                         |   |         |
|---------------------|---------------------------------------------------------|---------------------------------------------------------|---|---------|
| danazol             | SEX HORMONES AND MODULATORS OF THE GENITAL SYSTEM (G03) | ANTIBACTERIALS FOR SYSTEMIC USE (J01)                   | Y | 0.0018  |
| guanfacine          | ANTIHYPERTENSIVES (C02)                                 | CARDIAC THERAPY (C01)                                   | Y | 0.0018  |
| levamisole          | ANTHELMINTICS (P02)                                     | BETA BLOCKING AGENTS (C07)                              | Y | 0.0018  |
| levamisole          | ANTHELMINTICS (P02)                                     | OPHTHALMOLOGICALS (S01)                                 | Y | 0.0018  |
| memantine           | PSYCHOANALEPTICS (N06)                                  | CARDIAC THERAPY (C01)                                   | Y | 0.0018  |
| metaraminol         | CARDIAC THERAPY (C01)                                   | ANTIBACTERIALS FOR SYSTEMIC USE (J01)                   | Y | 0.0018  |
| nomifensine         | PSYCHOANALEPTICS (N06)                                  | CARDIAC THERAPY (C01)                                   | Y | 0.0018  |
| pergolide           | ANTI-PARKINSON DRUGS (N04)                              | CARDIAC THERAPY (C01)                                   | Y | 0.0018  |
| proxymetacaine      | OPHTHALMOLOGICALS (S01)                                 | ANTIHISTAMINES FOR SYSTEMIC USE (R06)                   | Y | 0.0018  |
| sulfapyridine       | ANTIBACTERIALS FOR SYSTEMIC USE (J01)                   | ANTINEOPLASTIC AGENTS (L01)                             | Y | 0.0018  |
| trimethoprim        | ANTIBACTERIALS FOR SYSTEMIC USE (J01)                   | OPHTHALMOLOGICALS (S01)                                 | Y | 0.0018  |
| azacitidine         | ANTINEOPLASTIC AGENTS (L01)                             | ANTIBACTERIALS FOR SYSTEMIC USE (J01)                   | Y | 0.00099 |
| fluvastatin         | LIPID MODIFYING AGENTS (C10)                            | PSYCHOLEPTICS (N05)                                     | Y | 0.00099 |
| galantamine         | PSYCHOANALEPTICS (N06)                                  | SEX HORMONES AND MODULATORS OF THE GENITAL SYSTEM (G03) | Y | 0.00099 |
| metformin           | DRUGS USED IN DIABETES (A10)                            | PSYCHOLEPTICS (N05)                                     | Y | 0.00099 |
| pioglitazone        | DRUGS USED IN DIABETES (A10)                            | LIPID MODIFYING AGENTS (C10)                            | Y | 0.00098 |
| remoxipride         | PSYCHOLEPTICS (N05)                                     | ANTIBACTERIALS FOR SYSTEMIC USE (J01)                   | Y | 0.00098 |
| vinblastine         | ANTINEOPLASTIC AGENTS (L01)                             | ANTIHISTAMINES FOR SYSTEMIC USE (R06)                   | Y | 0.00098 |
| hydrochlorothiazide | DIURETICS (C03)                                         | OPHTHALMOLOGICALS (S01)                                 | Y | 0.00097 |
| bupropion           | PSYCHOANALEPTICS (N06)                                  | ANTINEOPLASTIC AGENTS (L01)                             | Y | 0.00096 |
| diloxanide          | ANTIPROTOZOALS (P01)                                    | PSYCHOANALEPTICS (N06)                                  | Y | 0.00096 |
| melatonin           | PSYCHOLEPTICS (N05)                                     | ANTINEOPLASTIC AGENTS (L01)                             | Y | 0.00096 |
| methoxamine         | CARDIAC THERAPY (C01)                                   | PSYCHOLEPTICS (N05)                                     | Y | 0.00096 |
| methoxamine         | CARDIAC THERAPY (C01)                                   | PSYCHOANALEPTICS (N06)                                  | Y | 0.00096 |
| paclitaxel          | ANTINEOPLASTIC AGENTS (L01)                             | PSYCHOANALEPTICS (N06)                                  | Y | 0.00096 |
| paclitaxel          | ANTINEOPLASTIC AGENTS (L01)                             | ANTIINFLAMMATORY AND ANTIRHEUMATIC PRODUCTS (M01)       | Y | 0.00096 |
| practolol           | BETA BLOCKING AGENTS (C07)                              | CARDIAC THERAPY (C01)                                   | Y | 0.00096 |
| tranlycypromine     | PSYCHOANALEPTICS (N06)                                  | CARDIAC THERAPY (C01)                                   | Y | 0.00096 |
| atovaquone          | ANTIPROTOZOALS (P01)                                    | ANTI-PARKINSON DRUGS (N04)                              | Y | 0.00095 |
| atovaquone          | ANTIPROTOZOALS (P01)                                    | LIPID MODIFYING AGENTS (C10)                            | Y | 0.00095 |
| estradiol           | SEX HORMONES AND MODULATORS OF THE GENITAL SYSTEM (G03) | PSYCHOLEPTICS (N05)                                     | Y | 0.00095 |
| mefloquine          | ANTIPROTOZOALS (P01)                                    | ANTIBACTERIALS FOR SYSTEMIC USE (J01)                   | Y | 0.00095 |
| primidone           | ANTIEPILEPTICS (N03)                                    | PSYCHOLEPTICS (N05)                                     | Y | 0.00095 |
| reserpine           | ANTIHYPERTENSIVES (C02)                                 | ANTIPROTOZOALS (P01)                                    | Y | 0.00095 |
| reserpine           | ANTIHYPERTENSIVES (C02)                                 | ANTIEPILEPTICS (N03)                                    | Y | 0.00095 |
| rolitetracycline    | ANTIBACTERIALS FOR SYSTEMIC USE (J01)                   | ANTIEPILEPTICS (N03)                                    | Y | 0.00095 |
| dopamine            | CARDIAC THERAPY (C01)                                   | CARDIAC THERAPY (C01)                                   | N | 0.00095 |

|                |                                                         |                                                   |   |          |
|----------------|---------------------------------------------------------|---------------------------------------------------|---|----------|
| amiloride      | DIURETICS (C03)                                         | CARDIAC THERAPY (C01)                             | Y | 0.00094  |
| gemfibrozil    | LIPID MODIFYING AGENTS (C10)                            | CARDIAC THERAPY (C01)                             | Y | 0.00094  |
| mebendazole    | ANTHELMINTICS (P02)                                     | OPHTHALMOLOGICALS (S01)                           | Y | 0.00094  |
| praziquantel   | ANTHELMINTICS (P02)                                     | CARDIAC THERAPY (C01)                             | Y | 0.00094  |
| praziquantel   | ANTHELMINTICS (P02)                                     | ANTINEOPLASTIC AGENTS (L01)                       | Y | 0.00094  |
| praziquantel   | ANTHELMINTICS (P02)                                     | ANTIHYPERTENSIVES (C02)                           | Y | 0.00094  |
| selegiline     | ANTI-PARKINSON DRUGS (N04)                              | CARDIAC THERAPY (C01)                             | Y | 0.00094  |
| tacrine        | PSYCHOANALEPTICS (N06)                                  | OPHTHALMOLOGICALS (S01)                           | Y | 0.00094  |
| cyclopentolate | OPHTHALMOLOGICALS (S01)                                 | CARDIAC THERAPY (C01)                             | Y | 0.00093  |
| disopyramide   | CARDIAC THERAPY (C01)                                   | OPHTHALMOLOGICALS (S01)                           | Y | 0.00093  |
| dorzolamide    | OPHTHALMOLOGICALS (S01)                                 | DIURETICS (C03)                                   | Y | 0.00093  |
| dydrogesterone | SEX HORMONES AND MODULATORS OF THE GENITAL SYSTEM (G03) | OPHTHALMOLOGICALS (S01)                           | Y | 0.00093  |
| dydrogesterone | SEX HORMONES AND MODULATORS OF THE GENITAL SYSTEM (G03) | ANTHELMINTICS (P02)                               | Y | 0.00093  |
| lomustine      | ANTINEOPLASTIC AGENTS (L01)                             | DRUGS USED IN DIABETES (A10)                      | Y | 0.00093  |
| lomustine      | ANTINEOPLASTIC AGENTS (L01)                             | ANTIEPILEPTICS (N03)                              | Y | 0.00093  |
| perhexiline    | CALCIUM CHANNEL BLOCKERS (C08)                          | PSYCHOANALEPTICS (N06)                            | Y | 0.00093  |
| phenformin     | DRUGS USED IN DIABETES (A10)                            | ANTIBACTERIALS FOR SYSTEMIC USE (J01)             | Y | 0.00093  |
| cyproterone    | SEX HORMONES AND MODULATORS OF THE GENITAL SYSTEM (G03) | CARDIAC THERAPY (C01)                             | Y | 0.00092  |
| diltiazem      | CALCIUM CHANNEL BLOCKERS (C08)                          | PSYCHOANALEPTICS (N06)                            | Y | 0.00092  |
| milrinone      | CARDIAC THERAPY (C01)                                   | ANTIINFLAMMATORY AND ANTIRHEUMATIC PRODUCTS (M01) | Y | 0.00092  |
| trimethadione  | ANTIEPILEPTICS (N03)                                    | ANTINEOPLASTIC AGENTS (L01)                       | Y | 0.00092  |
| tropicamide    | OPHTHALMOLOGICALS (S01)                                 | PSYCHOLEPTICS (N05)                               | Y | 0.00092  |
| tropicamide    | OPHTHALMOLOGICALS (S01)                                 | ANTIBACTERIALS FOR SYSTEMIC USE (J01)             | Y | 0.00092  |
| valproic_acid  | ANTIEPILEPTICS (N03)                                    | PSYCHOANALEPTICS (N06)                            | Y | 0.00092  |
| gefitinib      | ANTINEOPLASTIC AGENTS (L01)                             | ANTIPROTOZOALS (P01)                              | Y | 0.00091  |
| guanfacine     | ANTIHYPERTENSIVES (C02)                                 | OPHTHALMOLOGICALS (S01)                           | Y | 0.00091  |
| proxymetacaine | OPHTHALMOLOGICALS (S01)                                 | PSYCHOANALEPTICS (N06)                            | Y | 0.00091  |
| trimethoprim   | ANTIBACTERIALS FOR SYSTEMIC USE (J01)                   | CARDIAC THERAPY (C01)                             | Y | 0.00091  |
| amrinone       | CARDIAC THERAPY (C01)                                   | BETA BLOCKING AGENTS (C07)                        | Y | 9.00E-04 |
| amrinone       | CARDIAC THERAPY (C01)                                   | PSYCHOANALEPTICS (N06)                            | Y | 9.00E-04 |
| amrinone       | CARDIAC THERAPY (C01)                                   | ANTIBACTERIALS FOR SYSTEMIC USE (J01)             | Y | 9.00E-04 |
| chloroquine    | ANTIPROTOZOALS (P01)                                    | PSYCHOLEPTICS (N05)                               | Y | 9.00E-04 |
| tolazamide     | DRUGS USED IN DIABETES (A10)                            | ANTINEOPLASTIC AGENTS (L01)                       | Y | 9.00E-04 |
| memantine      | PSYCHOANALEPTICS (N06)                                  | PSYCHOANALEPTICS (N06)                            | N | 9.00E-04 |
| acetohexamide  | DRUGS USED IN DIABETES (A10)                            | CALCIUM CHANNEL BLOCKERS (C08)                    | Y | 0.00089  |
| acetohexamide  | DRUGS USED IN DIABETES (A10)                            | ANTIINFLAMMATORY AND ANTIRHEUMATIC PRODUCTS (M01) | Y | 0.00089  |
| amodiaquine    | ANTIPROTOZOALS (P01)                                    | ANTIHYPERTENSIVES (C02)                           | Y | 0.00089  |

|                    |                                       |                                                         |   |         |
|--------------------|---------------------------------------|---------------------------------------------------------|---|---------|
| lymecycline        | ANTIBACTERIALS FOR SYSTEMIC USE (J01) | ANTIPROTOZOALS (P01)                                    | Y | 0.00089 |
| proguanil          | ANTIPROTOZOALS (P01)                  | PSYCHOLEPTICS (N05)                                     | Y | 0.00089 |
| propafenone        | CARDIAC THERAPY (C01)                 | ANTIEPILEPTICS (N03)                                    | Y | 0.00089 |
| brompheniramine    | ANTIHISTAMINES FOR SYSTEMIC USE (R06) | PSYCHOLEPTICS (N05)                                     | Y | 0.00088 |
| vorinostat         | ANTINEOPLASTIC AGENTS (L01)           | BETA BLOCKING AGENTS (C07)                              | Y | 0.00087 |
| vorinostat         | ANTINEOPLASTIC AGENTS (L01)           | SEX HORMONES AND MODULATORS OF THE GENITAL SYSTEM (G03) | Y | 0.00087 |
| hydroflumethiazide | DIURETICS (C03)                       | OPHTHALMOLOGICALS (S01)                                 | Y | 0.00086 |
